1 **Drosophila beta-Tubulin 97EF is upregulated at low temperature and stabilizes**  
2 **microtubules**

3

4

5 Faina Myachina<sup>1</sup>, Fritz Bosshardt<sup>1</sup>, Johannes Bischof<sup>1</sup>, Moritz Kirschmann<sup>2</sup>, Christian F.  
6 Lehner<sup>1,3</sup>

7

8 1) Institute of Molecular Life Sciences (IMLS), University of Zurich, 8057 Zurich, Switzerland

9 2) Center for Microscopy and Image Analysis, University of Zurich, 8057 Zurich, Switzerland

10 3) Author for correspondence ([christian.lehner@imls.uzh.ch](mailto:christian.lehner@imls.uzh.ch))

11

12

13 Running title: Drosophila beta-Tubulin 97EF

14

15 KEY WORDS: microtubules, tubulin isoform, boundary cells, low temperature, ectotherm

16

17 **Summary statement**

18 Ectotherms thrive within an often remarkable temperature range. At low temperature,  
19 *betaTub97EF*, a beta-tubulin paralog stabilizing microtubules, is upregulated in a tissue-  
20 specific manner in the fly *Drosophila melanogaster*.

21

22 **Abstract**

23 Cells in ectotherms function normally within an often wide temperature range. As  
24 temperature dependence is not uniform across all the distinct biological processes,  
25 acclimation presumably requires complex regulation. The molecular mechanisms coping  
26 with the disruptive effects of temperature variation are still poorly understood.  
27 Interestingly, one of five different beta-tubulin paralogs, *betaTub97EF*, was among the  
28 genes up-regulated at low temperature in cultured *Drosophila* cells. As microtubules are  
29 known to be cold-sensitive, we analyzed whether *betaTub97EF* protects microtubules at low  
30 temperatures. During development at the optimal temperature (25°C), *betaTub97EF* was  
31 expressed in a tissue-specific pattern primarily in the gut. There, as well as in hemocytes,  
32 expression was increased at low temperature (14°C). While *betaTub97EF* mutants were  
33 viable and fertile at 25°C, their sensitivity within the well-tolerated range was slightly  
34 enhanced during embryogenesis specifically at low temperatures. Changing beta-tubulin  
35 isoform ratios in hemocytes demonstrated that beta-Tubulin 97EF has a pronounced  
36 microtubule stabilizing effect. Moreover, *betaTub97EF* is required for normal microtubule  
37 stability in the gut. These results suggest that *betaTub97EF* up-regulation at low  
38 temperature contributes to acclimation by stabilizing microtubules.

39

40 **Introduction**

41 Many ecological niches are exposed to ambient temperature fluctuations. Distinct strategies  
42 have evolved to cope with the disruptive effects of temperature changes on cellular  
43 homeostasis. Endotherms like humans rely primarily on internally generated heat for  
44 maintenance of a relatively high and constant core body temperature. However, the  
45 majority of organisms are ectotherms. Their internal temperature is primarily dictated by  
46 the environment. But even in endotherms, the exposed peripheral cells need to function  
47 over a range of temperatures.

48 Arguably the most extensive analyses of the cellular response to low temperature in  
49 eukaryotes so far have been done with yeast (Gasch et al., 2000; Taymaz-Nikerel et al.,  
50 2016), confirming the general notion that rapid temperature shifts to nonlethal low  
51 temperature disrupt cellular homeostasis, triggering an initial transient stress response  
52 followed by persistent acclimation. Moreover, the response to low temperature is quite  
53 distinct from the general stress response induced by many other perturbations.

54 In animals, low temperature acclimation includes additional response levels (Denlinger  
55 and Lee, 2010; Hayward et al., 2007). Organ systems govern complex behavioral and  
56 metabolic responses. At the cellular level, microtubules have long been recognized to be  
57 cold-sensitive in mammals (Correia and Williams, 1983). Microtubules are dynamic  
58 cytoskeletal elements involved in innumerable processes (Nogales and Zhang, 2016). They  
59 are polymerized from heterodimers of alpha- and beta-tubulin. Heterodimers can associate  
60 longitudinally into protofilaments. Lateral interactions between parallel protofilaments  
61 organize these into hollow cylindrical tubes. Both alpha- and beta-tubulin bind GTP at a  
62 conserved site. GTP-tubulin heterodimers incorporate efficiently at growing microtubule  
63 ends. Polymerization is coupled to hydrolysis of the GTP bound to beta-tubulin. This  
64 regulates microtubule dynamics and gives rise to dynamic instability where growing phases  
65 alternate with shrinking phases (Mitchison and Kirschner, 1984; Zhang et al., 2015). Above a  
66 critical concentration, GTP-tubulin purified from mammalian sources polymerizes into  
67 microtubules at 37°C, largely driven by the entropically favorable displacement of structured  
68 water at the subunit interfaces (Correia and Williams, 1983). Reflecting the positive  
69 correlation between entropic drive and temperature, these microtubules depolymerize  
70 after a shift to 4°C in a GTP hydrolysis-independent manner (Fygenson et al., 1994).

71 Psychrophilic ectotherms assemble microtubules even below 0°C. Analysis of their genes  
72 have revealed amino acid changes that likely alter the temperature dependence of  
73 microtubule stability (Chiappori et al., 2012; Detrich et al., 2000; Modig et al., 2000;  
74 Tartaglia and Shain, 2008). While such evolutionary adaptations support life at constant low  
75 temperature, organisms exposed to short term thermal fluctuations presumably depend on  
76 temperature controlled regulation of microtubule dynamics. In principle, regulated  
77 expression of tubulin paralogs with distinct properties is conceivable, as well as control by  
78 posttranslational modifications and indirectly via microtubule-associated proteins (MAPs)  
79 and motors. Paralogs encoding distinct alpha- and beta-tubulins have evolved in many

80 lineages (Findeisen et al., 2014). Sequence differences are found predominantly in the C-  
81 terminal tails, where also most posttranslational modifications occur. These modifications  
82 are thought to generate a 'tubulin-code' controlling binding and function of many MAPs and  
83 motors (Gadadhar et al., 2017; Janke, 2014; Sirajuddin et al., 2014; Yu et al., 2015).

84 In mammals, MAP6 adapts its conformation according to temperature to maintain  
85 microtubule networks in cells exposed low temperature (Delphin et al., 2012). Moreover,  
86 the recent production of pure tubulin isoforms has definitely established inherent isoform-  
87 specific differences in microtubule dynamics *in vitro* (Pamula et al., 2016; Ti et al., 2016;  
88 Vemu et al., 2016).

89 Genetic analyses in *Drosophila melanogaster* have provided the first unequivocal evidence  
90 for paralog-specific functions *in vivo* (Ludueña and Banerjee, 2008). The genome of *D.*  
91 *melanogaster* contains five alpha-tubulin genes, as well as five beta-tubulin genes  
92 (*betaTub56D*, *betaTub60D*, *betaTub85D*, *betaTub97EF*, and *CG32396* designated here as  
93 *betaTub65B*). The most divergent beta-tubulin paralogs (*betaTub85D* and *betaTub65B*) are  
94 expressed exclusively in testis. While *betaTub65B* has not yet been studied, *betaTub85D* has  
95 been characterized in considerable detail. It is required in the germline for male meiotic  
96 divisions and sperm axoneme formation (Fuller et al., 1988; Kemphues et al., 1982). These  
97 processes still fail when *betaTub60D*, which is not normally expressed in the male germline,  
98 is expressed instead of *betaTub85D* (Hoyle and Raff, 1990). The normal expression of  
99 *betaTub60D* is also tissue-specific, but considerably more complex than that of the testis-  
100 specific *betaTub85D*. During embryogenesis *betaTub60D* expression starts in differentiating  
101 mesodermal cell types, but occurs also in chordotonal organs, imaginal discs and somatic  
102 cells of the adult gonads (Kimble et al., 1990; Rudolf et al., 2012). The zygotic expression of  
103 *betaTub56D* has also pronounced tissue-specificity, but at the start of embryogenesis the  
104 abundant maternal *betaTub56D* contribution is the only source of beta-tubulin (Buttgereit  
105 et al., 1996).

106 Here we report that *betaTub97EF*, an uncharacterized beta tubulin paralog, is upregulated  
107 at low temperature in specific cell types. Moreover, we demonstrate that it increases  
108 microtubule stability.

109

## 110 **Results**

### 111 ***betaTub97EF* encodes a temperature-regulated beta-tubulin**

112 Genome-wide expression profiling with *Drosophila* S2R+ cells over a range of different  
113 growth temperatures revealed *betaTub97EF* among the temperature-responsive genes.  
114 Compared to 25°C, the presumed optimal temperature, *betaTub97EF* transcript levels were  
115 increased at lower temperatures (11 and 14°C) and decreased at a higher temperature  
116 (30°C) in multiple independent experiments (Fig. 1A; data not shown). In another cell line,  
117 embryonic cells immortalized exploiting *Act5c>Ras85D<sup>G12V</sup>* as described recently (Simcox et  
118 al., 2008), *betaTub97EF* transcript levels were also twofold higher at 14°C compared to 30°C.  
119 In contrast to *betaTub97EF*, other tubulin genes were at most marginally affected by growth  
120 temperature (Fig. 1A). Independent analyses with quantitative reverse transcription  
121 polymerase chain reaction (qRT-PCR) confirmed the microarray results (Fig. 1B,C). According  
122 to qRT-PCR, *betaTub97EF* transcripts amount to about 8% of the total beta-tubulin  
123 transcripts, while *betaTub56D* and *betaTub60D* contribute 46% each in S2R+ cells at 25°C  
124 (Fig. 1B). At 14°C, *betaTub97EF* transcripts are more than twofold higher (Fig. 1C).

125 To study temperature effects on protein abundance, we raised an antibody against beta-  
126 Tubulin 97EF using a C-terminal peptide for immunization. The C-terminal tails are the most  
127 divergent regions of the highly conserved beta-tubulins (Fig. S1). They have previously  
128 permitted production of paralog-specific antibodies (Kimble et al., 1989; Leiss et al., 1988).  
129 Immunoblotting experiments with extracts from bacteria expressing GST fusion proteins  
130 with extensions identical to the tails of the different beta-tubulin paralogs were used for  
131 initial antibody characterization (Fig. S2A,B). Immunoblotting with these extracts also  
132 demonstrated that the mouse monoclonal antibody E7 (Chu and Klymkowsky, 1989) detects  
133 with almost equal sensitivity all of the beta-tubulin paralogs, except beta-Tubulin 65B, a  
134 most divergent uncharacterized paralog with low testis-specific expression. The specificity of  
135 the newly generated antibodies for beta-Tubulin 97EF was further confirmed by  
136 immunoblotting and immunolabeling experiments using *betaTub97EF* mutants (see below).  
137 Quantitative immunoblotting indicated that the amount of beta-Tubulin 97EF in S2R+ cells is  
138 only about 2% of the total beta tubulin protein at 25°C (Fig. S1C). However, immunoblotting  
139 with extracts of S2R+ cells grown at different temperatures demonstrated that beta-Tubulin  
140 97EF levels were temperature-dependent. Although slightly less pronounced than  
141 *betaTub97EF* transcripts, protein was significantly more abundant at low temperature (11  
142 and 14°C) and reduced at high temperature (30°C) compared to 25°C (Fig. 1D,E). As  
143 expected (Radermacher et al., 2014), control immunoblotting with RL2, an antibody

144 recognizing O-GlcNAc modified proteins, revealed the opposite temperature dependence. In  
145 conclusion, in cultured cells both mRNA and protein levels of *betaTub97EF* respond to  
146 temperature. Higher levels are present at low temperatures.

147

#### 148 ***betaTub97EF* expression occurs predominantly in the gut**

149 Three of the five beta-tubulin paralogs, *betaTub56D*, *betaTub60D* and *betaTub85D* have  
150 been studied in considerable detail (Rudolf et al., 2012, and references given therein) but  
151 not *betaTub97EF*. Therefore, the pattern of *betaTub97EF* expression during development at  
152 25°C was analyzed. By immunoblotting (Fig. 2A), beta-Tubulin 97EF could not be detected at  
153 the onset of embryonic development, consistent with RNA-Seq data (Graveley et al., 2011).  
154 Zygotic expression started between 6-9 hours after egg deposition (AED) and increased  
155 during the second half of embryogenesis. The specificity of the corresponding immunoblot  
156 signals (Fig. 2A) was confirmed with extracts of *betaTub97EF* mutant embryos (see below).

157 For comparison, immunoblotting with anti-beta-Tubulin 60D confirmed an expression  
158 program similar to beta-Tubulin 97EF with a slightly earlier onset and peak of zygotic  
159 expression (Fig. 2A). Moreover, anti-pan-beta-tubulin E7 revealed maximal levels of total  
160 beta-tubulin at the start of embryogenesis (Fig. 2A) when the abundant maternally  
161 contributed beta-Tubulin 56D is present (Rudolf et al., 2012). The monoclonal antibody  
162 DM1A (Bloese et al., 1984) was used to detect alpha-tubulins (Fig. 2A). Based on its epitope  
163 characterization (Breitling and Little, 1986), DM1A presumably reacts with all or most of the  
164 *Drosophila* alpha-tubulins but the precise affinities for the different isoforms are not known.

165 Immunofluorescent labeling was performed to determine the spatial pattern of beta-  
166 Tubulin 97EF expression during embryogenesis (Fig. 2B). beta-Tubulin 97EF was not  
167 detected until stage 12 when weak specific signals were observed in the developing hindgut.  
168 Subsequently signal intensities increased in the hindgut. Expression was also detected in  
169 foregut and posterior spiracles, as well as more weakly in the midgut (Fig. 2B). The  
170 predominantly gut-specific expression pattern of beta-Tubulin 97EF is clearly distinct from  
171 that of beta-Tubulin 60D with its primarily muscle-specific expression pattern (Kimble et al.,  
172 1989; Leiss et al., 1988), and data not shown). The maternally contributed, abundant beta-  
173 Tubulin 56D is ubiquitously and uniformly distributed during embryogenesis, as indicated by  
174 E7 staining (data not shown).

175 To characterize anti-beta-Tubulin 97EF staining in further detail, the region with the  
176 embryonic hindgut was analyzed at high magnification (Fig. 2C). This revealed beta-Tubulin  
177 97EF in the epithelial cells of the hindgut, but not in the surrounding visceral muscles. Anti-  
178 beta-Tubulin 60D resulted in the opposite pattern (data not shown). Within the hindgut  
179 epithelium, beta-Tubulin 97EF was most abundant in the so-called boundary cells (Fig. 2C), a  
180 row of single cell width extending along both sides of the hindgut tube between the ventral  
181 and dorsal compartment (Iwaki and Lengyel, 2002).

182 At maximal resolution, near perfect spatial overlap of the signals obtained by double  
183 labeling with anti-beta-Tubulin 97EF and anti-alpha-tubulin was observed (Fig. 2D). For  
184 these high resolution analyses, we used released larval hemocytes which spread out flat on  
185 coverslips, providing superior optical conditions. Although beta-Tubulin 97EF was  
186 colocalized with alpha-tubulin, the spatial intensity distributions of the signals obtained by  
187 double labeling with the two antibodies were not identical. Accordingly, beta-Tubulin 97EF  
188 might be enriched in cortical microtubules, but alternative explanations are not excluded  
189 (see discussion).

190 Immunolabeling revealed that beta-Tubulin 97EF is also present in the larval and adult gut  
191 (Fig. S3B,C). Signals in enterocytes were rather uniform, i.e., not as in the embryonic hindgut  
192 where boundary cells have higher levels. beta-Tubulin 97EF was not only detected in the  
193 gut. Specific signals, although weaker, were observed in wing imaginal discs, larval  
194 hemocytes and ovarial follicle cells (see below and data not shown).

195 We conclude that *betaTub97EF* expression occurs in a pattern distinct from that of other  
196 beta-tubulin paralogs. *In situ* hybridization and a *betaTub97EF>GFP* reporter allele  
197 suggested that tissue and cell-type specificity of *betaTub97EF* expression is transcriptionally  
198 controlled (data not shown).

199

### 200 ***betaTub97EF* upregulation by low temperature is tissue-specific**

201 To address the physiological role of *betaTub97EF*, we characterized mutant alleles (Fig.  
202 3A). Three *Minos* transposon insertions in the *betaTub97EF* region were analyzed (Fig. 3A).  
203 PCR assays confirmed the annotated insertion positions. The insertion  
204 *Mi{MIC}betaTub97EF<sup>Mi06334</sup>* within the first intron (*betaTub97EF<sup>MiMIC</sup>* in the following)  
205 introduces a splice acceptor site followed by translational stops in all three reading frames.  
206 By conversion of this insertion (Venken et al., 2011), a derivative with an extra EGFP-



207 encoding exon within this first intron was obtained (*betaTub97EF<sup>EGFP</sup>*). The predicted protein  
208 product is expected to be non-functional because the EGFP insertion disrupts the tubulin  
209 core domain. Indeed, beta-Tubulin97EF<sup>EGFP</sup> was not incorporated into microtubules  
210 according to fluorescence microscopy.

211 By qRT-PCR (Fig. 3B) and immunoblotting (Fig. 3C), we analyzed how *betaTub97EF*  
212 expression was affected by the transposon insertions. While two ,  
213 *Mi{ET1}betaTub97EF<sup>MB01877</sup>* and *Mi{ET1}betaTub97EF<sup>MB03812</sup>*, reduced expression,  
214 *betaTub97EF<sup>MiMIC</sup>* appeared to abolish it completely (Fig. 3B,C). Residual beta-Tubulin 97EF,  
215 potentially expressed from the *betaTub97EF<sup>MiMIC</sup>* allele, cannot be more than 3% of the  
216 normal level, because stronger expression would have been detectable (Fig. 3C). In case of  
217 *betaTub97EF<sup>EGFP</sup>*, immunoblotting confirmed the expected expression of a larger beta-  
218 Tubulin 97EF variant with an internal EGFP domain (Fig. 3C). As anti-beta-Tubulin 97EF also  
219 revealed a weak band at the position of normal beta-Tubulin 97EF, rare skipping of the extra  
220 EGFP exon present in the *betaTub97EF<sup>EGFP</sup>* allele cannot be excluded and might allow  
221 expression of normal beta-Tubulin 97EF up to 10% of wild-type levels. Alternatively, the  
222 weak band might represent one of the obvious beta-Tubulin 97EF<sup>EGFP</sup> degradation products,  
223 rather than residual normal beta-Tubulin 97EF.

224 Unexpectedly given the conservation of the *betaTub97EF* ortholog during an estimated  
225 300 million years of insect evolution (Findeisen et al., 2014), *betaTub97EF* function was  
226 found to be dispensable for viability and fertility under standard laboratory conditions.  
227 *betaTub97EF<sup>MiMIC</sup>* could be propagated as a homozygous stock. Compared to *w<sup>1</sup>*, fertility  
228 was 25% lower in both sexes in flies with *betaTub97EF<sup>MiMIC</sup>* over a deficiency deleting  
229 *betaTub97EF* (*Df(3R)BSC460*).

230 Since *betaTub97EF* expression is especially high in boundary cells of the embryonic  
231 hindgut, we analyzed whether these cells are present in *betaTub97EF<sup>MiMIC</sup>* mutants. Labeling  
232 of Crumbs, an apical membrane protein expressed at very high levels in boundary cells  
233 (Kumichel and Knust, 2014), demonstrated that these cells are present in *betaTub97EF<sup>MiMIC</sup>*  
234 mutants (Fig. 3D). To compare hindgut morphology in *betaTub97EF<sup>MiMIC</sup>* mutants and  
235 control embryos with ultrastructural resolution, we applied focused ion beam scanning  
236 electron microscopy (FIBSEM). While this failed to expose abnormalities in *betaTub97EF<sup>MiMIC</sup>*  
237 mutants, our three-dimensional reconstructions revealed that boundary cells differentiate  
238 striking undulae propagating longitudinally from cell to cell along the hindgut epithelial tube



239 (Fig. S4), rather than prominent microvilli as suggested previously based on two-dimensional  
240 EM analyses (Iwaki and Lengyel, 2002; Kumichel and Knust, 2014; Soplop et al., 2012).

241 The hindgut is one of the organs that develops left/right asymmetry during development  
242 (Coutelis et al., 2014). *betaTub97EF<sup>MiMIC</sup>* mutants (n = 100) were found to have normal  
243 left/right asymmetry in larval and adult hindgut. We also addressed whether absence of  
244 beta-Tubulin 97EF from the gut might increase sensitivity to hyperosmotic diet. Therefore,  
245 survival to the adult stage after larval development in high salt food was analyzed. However,  
246 *betaTub97EF<sup>MiMIC</sup>* mutants were not more salt-sensitive than *w<sup>1</sup>* control (data not shown).

247 Our phenotypic analyses suggested that *betaTub97EF* does not provide crucial functions at  
248 temperatures close to the optimum of 25°C. However, since *betaTub97EF* expression in  
249 S2R+ cells is increased at low temperature (Fig. 1), this gene might be of a greater  
250 importance during development and life at sub-optimal temperatures. First we analyzed  
251 whether regulation of *betaTub97EF* expression by temperature occurs also in embryos.  
252 After egg collection at 25°C, aliquots were shifted at 3-6 hours AED to either 14, 25 or 30°C.  
253 Once embryos had reached stage 16 (peak of *betaTub97EF* expression), total RNA was  
254 analyzed by qRT-PCR. Among tubulin paralogs, *betaTub97EF* is unique with regard to the  
255 presence of two mutually exclusive exons (4B and 4C) within the region coding for the  
256 conserved tubulin protein core (Fig. 3A) (Findeisen et al., 2014). These two mutually  
257 exclusive exons appear to be characteristic for dipterans (Findeisen et al., 2014). In *D.*  
258 *melanogaster* they share 77% identity at the amino acid sequence level (Fig. S1). Based on  
259 splice junction counts (Graveley et al., 2011), the 4B variant is about 15 fold more abundant  
260 than the 4C variant throughout development. Our qRT-PCR analyses were done with two  
261 distinct primer pairs designed to detect specifically one or the other isoform. While the  
262 minor 4C transcripts were found to be downregulated, the major 4B transcripts were up-  
263 regulated at lower temperature (11°C) (Fig. 4A).

264 Aliquots of the same embryos were also analyzed by immunoblotting (Fig. 4B). This  
265 confirmed that beta-Tubulin 97EF protein was up-regulated after development at low  
266 temperature. On average, beta-Tubulin 97EF levels were fourfold higher at 14°C compared  
267 to 30°C (Fig. 4B). Although with variation in extent, higher beta-Tubulin 97EF levels at the  
268 lower temperature were consistently observed in each of three experiments. In contrast,  
269 signals obtained by immunoblotting with anti-beta-Tubulin 60D and anti-alpha-tubulin were

270 not affected by temperature (Fig. 4B), indicating that induction by low temperature is  
271 specific for the *betaTub97EF* paralog.

272 To address whether the upregulation of beta-Tubulin 97EF at low temperature occurs  
273 globally or in a tissue-specific manner we performed quantitative immunofluorescent  
274 labeling. To achieve maximal accuracy and minimize problems caused by potential fixation  
275 and staining artefacts, these experiments were performed by combining four different types  
276 of stage 16 embryos before fixation and staining in a pool (Fig. 4C). Two of these embryo  
277 types were processed after development at 14°C (Fig. 4C, blue). To identify these “cold”  
278 embryos during the microscopic analyses, they were collected from strains expressing red  
279 fluorescent centromere protein Cenp-C (*g-tdTomato-CenpC*) (Fig. 4C, red stars). In contrast,  
280 the two other types, the “warm” embryos, processed after development at a higher  
281 temperature (25°C or 30°C), did not have this marker transgene. Based on red fluorescent  
282 centromere signals (as illustrated with the brain lobe regions in Fig. 4C) “cold” and “warm”  
283 embryos were identified. Moreover, in order to quantify the level of non-specific signals  
284 resulting from anti-beta-Tubulin 97EF labeling, both the “cold” and the “warm” embryos  
285 were a mixture. Half were *betaTub97EF<sup>MiMIC</sup>* mutants and the other half had two wild-type  
286 alleles of *betaTub97EF* (Fig. 4C, + and -, respectively). Green fluorescent anti-beta-Tubulin  
287 97EF labeling revealed the *betaTub97EF* genotype during the microscopic analyses. In  
288 addition, anti-alpha-tubulin labeling was visualized using a far-red fluorophore.

289 Quantification of the specific, background-corrected anti-beta-Tubulin 97EF signals  
290 indicated that beta-Tubulin 97EF levels were 1.7 fold higher in the embryonic hindgut at  
291 14°C compared to 25°C, and 2 fold higher when compared to 30°C (Fig. 4D,E). Tissue-specific  
292 beta-Tubulin 97EF upregulation in the hindgut at low temperature was also observed when  
293 *g-tdTomato-CenpC* was used for marking the “warm” instead of the “cold” embryos. In  
294 contrast, anti-alpha-tubulin signals were not affected by temperature (Fig. 4D,E). Analogous  
295 quantification of signals within epidermis and somatic muscles did not reveal any  
296 temperature effects, neither on beta-Tubulin 97EF nor on alpha-tubulin signals (data not  
297 shown).

298 Although low temperature induces higher beta-Tubulin 97EF expression in the hindgut,  
299 this organ appeared to be morphologically normal in *betaTub97EF<sup>MiMIC</sup>* mutants even after  
300 embryonic development at 14°C or 12°C (data not shown). Despite normal morphology,  
301 certain cells or tissues might not be fully functional in *betaTub97EF<sup>MiMIC</sup>* mutants. Therefore

302 we analyzed temperature sensitivity of development to the larval and adult stages. Embryos  
303 were collected at 25°C and aliquots were shifted after gastrulation, but before the onset of  
304 *betaTub97EF* expression, to temperatures within the range of 10 to 34°C (Fig. 4F). The rate  
305 of larval hatching from eggs (Fig. 4G) as well as the rate of development to the adult stage  
306 was determined (Fig. 4H). At 10°C, no larvae were observed to hatch, neither from control  
307 nor from *betaTub97EF* mutant eggs. Similarly, only very few larvae hatched at 11°C and 12°C  
308 (Fig. 4G). Interestingly, compared to control, 25% fewer *betaTub97EF<sup>MiMIC</sup>* mutants  
309 completed embryogenesis successfully at 14°C (Fig. 4G). This temperature of 14°C is the  
310 lower limit for completion of the entire life cycle for standard *D. melanogaster* laboratory  
311 strains. Therefore, *betaTub97EF* function appears to be important at the lower end of the  
312 temperature range compatible with the complete life cycle. In contrast at 30°C, the upper  
313 end of this compatible range, there were no significant survival differences between  
314 *betaTub97EF<sup>MiMIC</sup>* mutants and control, as well as at the optimum temperature of 25°C (Fig.  
315 4G). Only at more drastically elevated temperatures, embryogenesis of *betaTub97EF*  
316 mutants was less successful than in controls (Fig. 4G). When analyzing development up to  
317 the adult stage, *betaTub97EF* mutants were found to be significantly weaker than control at  
318 temperatures below as well as above the optimum (Fig. 4H). By immunoblotting with total  
319 larval extracts, we were actually unable to detect beta-Tubulin 97EF upregulation at low  
320 temperature at this developmental stage (data not shown). In conclusion, within the  
321 temperature range where the full *D. melanogaster* life cycle can be completed with a  
322 normal genotype, the importance of *betaTub97EF* function for successful embryogenesis  
323 increases towards the lower limit, supporting the notion that *betaTub97EF* upregulation at  
324 low temperature contributes to acclimation.

325

### 326 **beta-Tubulin 97EF generates stable microtubules**

327 Functional redundancy of co-expressed beta-tubulin paralogs might explain the mild  
328 phenotypic consequences of *betaTub97EF* null mutations. In *betaTub97EF* mutant embryos,  
329 the maternally provided abundant beta-Tubulin 56D (Buttgereit et al., 1991) is present at  
330 least initially. To address potential functional redundancy, we first characterized  
331 *betaTub56D* mutant alleles. We studied two transposon insertions, *betaTub56D<sup>NP0949</sup>* and  
332 *betaTub56D<sup>EY12330</sup>*, that appeared likely to be detrimental for *betaTub56D* function (Fig. 5A).  
333 Both insertions were found to be homozygous lethal, as well as over a deficiency

334 (*Df(2R)BSC782*) that eliminates 5' upstream sequences including the promoter region and  
335 also the first *betaTub56D* exon (Fig. 5A). Moreover, the insertions failed to complement  
336 each other. Finally, the developmental lethality associated with  
337 *betaTub56D<sup>NP0949</sup>/Df(2R)BSC782* was completely suppressed by *UAS-betaTub56D*  
338 expression driven by *alphaTub84BP-GAL4* (Fig. 5A). Therefore, *betaTub56D<sup>NP0949</sup>* and  
339 *betaTub56D<sup>EY12330</sup>* are loss of function alleles of *betaTub56D*.

340 The lethality associated with *betaTub56D<sup>NP0949</sup>/Df(2R)BSC782* occurred after  
341 embryogenesis during the first larval instar (Fig. 5A), suggesting that the maternal  
342 *betaTub56D* contribution is sufficient for successful completion of embryogenesis. Indeed,  
343 the abundant maternal *betaTub56D* contribution was found to be stable throughout  
344 embryogenesis, as revealed by immunolabeling experiments using *Df(2R)BSC782* (data not  
345 shown). This maternal *betaTub56D* contribution might explain why hindgut development  
346 appeared to be normal even when zygotic function of both *betaTub97EF* and *betaTub56D*  
347 were missing during embryogenesis (data not shown).

348 Paralog retention after gene duplication during evolution usually depends on functional  
349 specialization at the level of expression and/or protein function. To address protein  
350 specialization, we compared the *betaTub56D* mutant rescue potential of the different beta-  
351 tubulin paralogs (Fig. 5A). For paralog expression in *betaTub56D* mutants  
352 (*betaTub56D<sup>NP0949</sup>/Df(2R)BSC782*), we always used the same *GAL4* driver (*alphaTub84BP-*  
353 *GAL4*) in combination with *UAS* transgenes that differed only within the coding region. The  
354 coding region was that of the beta-tubulin paralogs 56D, 60D, 65B, 85D, and 97EF with  
355 either exon 4B or 4C. As described above, *UAS-betaTub56D* expression resulted in  
356 complete rescue of *betaTub56D<sup>NP0949</sup>/Df(2R)BSC782* first instar larval lethality (Fig. 5A). In  
357 contrast, *UAS-betaTub97EF(4B)* and *UAS-betaTub97EF(4C)* provided only limited rescue.  
358 Lethality still occurred, but during the second larval instar rather than already during the  
359 first (Fig. 5A). While such a partial rescue was also obtained with *UAS-betaTub65B*, the  
360 others (*UAS-betaTub60D* and *UAS-betaTub85D*) did not appear to cause rescue (Fig. 5A).

361 Additional experiments with the *UAS* transgenes revealed that ectopic expression of  
362 some beta-tubulin paralogs is highly toxic in an otherwise normal background. When the  
363 *UAS* transgenes were expressed with *ey-GAL4* during eye development for example (Fig.  
364 5B), the beta-Tubulin 97EF isoforms were more toxic than all the other beta-tubulin  
365 paralogs. While the variant with the 4C exon was lethal, the 4B version resulted in small

366 deformed and rough eyes, indicating that the two beta-Tubulin 97EF isoforms are  
367 functionally distinct.

368 When *mata4-GAL-VP16* was used to drive *UASp-betaTub97EF(4B)* during oogenesis,  
369 female sterility was observed and the dumping of nurse cell cytoplasm into the oocyte that  
370 normally occurs during stage 10B was inhibited (Fig. 5C,D). Such a dumpless egg chamber  
371 phenotype was not obtained with *UASp-betaTub85D* or *UASp-betaTub60D* (Fig. 5D).  
372 Immunolabeling confirmed that ectopic expression of both the toxic beta-Tubulin 97EF and  
373 the non-toxic beta-Tubulin 60D occurred as expected in the germline starting during stage 2  
374 (Fig. S5). During wild-type oogenesis, both beta-Tubulin 97EF and beta-Tubulin 60D are  
375 normally expressed in somatic follicle cells but not in the germline (Fig. S5).

376 The C-terminal tails of tubulin paralogs are the most divergent regions and different types  
377 of posttranslational modifications occur predominantly in this region, potentially generating  
378 a tubulin code that might direct interactions with specific sets of MAPs and motor proteins.  
379 To evaluate whether the functional difference between beta-Tubulin 97EF(4B) and beta-  
380 Tubulin 56D reflects sequence changes within the core or the C-terminal tail, we performed  
381 *betaTub56D* mutant rescue experiments with *UASt* transgene encoding tail-swapped  
382 variants. This assay indicated that the functional difference between beta-Tubulin 97EF(4B)  
383 and beta-Tubulin 56D reflects alterations within both the core and the C-terminal tail  
384 regions (Fig. 5A). We conclude that *betaTub97EF* is not just expressed in a specific pattern  
385 but that it also codes for a beta-tubulin with unique functions as a result of sequence  
386 changes within both the tubulin core and the C-terminal tail region.

387 For further analysis of the functional differences between beta-Tubulin 97EF and beta-  
388 Tubulin 56D, we studied larval hemocytes. Since S2R+ cells have an expression profile most  
389 similar to hemocytes (Cherbas et al., 2011), it appeared likely that larval hemocytes express  
390 *betaTub97EF* in a temperature-regulated manner. Indeed, immunolabeling confirmed that  
391 larval hemocytes do not only express *betaTub56D* but also *betaTub97EF* (Figs 2D,6A).  
392 Moreover, the beta-Tubulin 97EF level was significantly increased at 14°C compared to 29°C  
393 (Fig. 6B). By exploiting larval hemocytes from *betaTub56D* mutants in combination with  
394 expression of *UASt* tubulin transgenes, we were able to alter the relative abundance of  
395 beta-Tubulin 97EF and beta-Tubulin 56D even at the optimal temperature of 25°C (Fig. 6A).  
396 Moreover, coexpression of *UASp-EB1-GFP* allowed quantitative analyses of some aspects of  
397 microtubule dynamics *in vivo*. EB1-GFP accumulates on the plus ends of growing

398 microtubules (Mimori-Kiyosue et al., 2000). Therefore, we used hemocytes from second  
399 instar larvae with mutations in *betaTub56D* (*betaTub56D<sup>NP0949</sup>/Df(2R)BSC782*) and  
400 *alphaTub84BP-GAL4* driven expression of *UAS-betaTub97EF(4B)* or *UAS-betaTub56D* and  
401 also *UASp-EB1-GFP* in some of the experiments. In the following, these hemocytes will be  
402 designated as *R-97EF* and *R-56D* (rescued by the 97EF and 56D paralog, respectively). In  
403 addition, we also analyzed hemocytes from siblings (*S-97EF* and *S-56D*, respectively) which  
404 expressed the *UAS* transgenes in balanced *Df(2R)BSC782* larvae with a functional  
405 endogenous *betaTub56D* copy on the balancer.

406 After immunolabeling, we quantified the signals obtained with anti-beta-Tubulin 97EF,  
407 DM1A (anti-alpha-tubulin) and E7 (anti-beta-tubulin) in the hemocytes (Fig. 6A). We point  
408 out that these signals primarily reflect the polymerized tubulin pool rather than the total  
409 cellular pool. Fixation seems to result in a loss of soluble tubulin, as suggested by the  
410 comparison of anti-tubulin immunolabeling signal intensities after brief pretreatment with  
411 either microtubule inhibitors (nocodazole, vinblastine) or buffer, respectively (Bossing et al.,  
412 2012; Schulman et al., 2013); see also Fig. 7). In addition, while non-specific background  
413 intensity resulting with anti-beta-Tubulin 97EF, as evident in *betaTub97EF* null mutant  
414 hemocytes, was subtracted from signal intensities obtained in the other genotypes, the  
415 extent of non-specific background resulting with DM1A (anti-alpha-tubulin) and E7 (anti-  
416 beta-tubulin) could not be assessed and subtracted. Moreover, non-linearity of detection  
417 might vary between different antibodies. Despite these limitations our signal quantification  
418 clearly revealed that expression of *UAS-betaTub97EF(4B)* and *UAS-betaTub56D*,  
419 respectively, has distinct consequences in larval hemocytes. *UAS-betaTub97EF(4B)*  
420 expression resulted in a pronounced increase of not only the signals obtained with anti-  
421 beta-Tubulin 97EF and E7, but also of those obtained with anti-alpha-tubulin (Fig. 6A, *R-97EF*  
422 and *S-97EF*). The anti-tubulin signals were particularly prominent in microtubule bundles  
423 along the cortex. In contrast, *UAS-betaTub56D* expression resulted in a more limited  
424 increase in signal intensities (Fig. 6A, *R-56D* and *S-56D*). Therefore, beta-Tubulin 97EF  
425 appears to stabilize microtubules. The posttranscriptional feedback preventing free tubulin  
426 heterodimer excess (Cleveland, 1988) likely contributes to the positive effect of *UAS-*  
427 *betaTub97EF(4B)* expression on anti-alpha-tubulin signal intensity.

428 For additional comparison of the effects resulting from *UAS-betaTub97EF(4B)* and *UAS-*  
429 *betaTub56D* expression, we analyzed EB1-GFP comet movements. In *R-56D* and *S-56D*



430 hemocytes, moving EB1-GFP comets were readily observed (Fig. 6C, Suppl Movie 1), similar  
431 as previously described in normal control hemocytes (Leśniewska et al., 2014). In contrast,  
432 EB1-GFP comets were far less evident in *R-97EF* and *S-97EF* hemocytes (Fig. 6C, Suppl Movie  
433 2). In these cells, the mobile comets were partially masked by stably persisting EB1-GFP  
434 signals all along the microtubule network and most prominently at the cell cortex. Newly  
435 appearing EB1-GFP comets advanced mostly along the persisting bundles. Quantification of  
436 the dynamics of EB1-GFP comets did not reveal statistically significant differences in the  
437 effects of *UAS-betaTub97EF(4B)* and *UAS-betaTub56D* expression on the speed of EB1-GFP  
438 comet migration (Fig. 6C). These findings suggested that beta-Tubulin 97EF increases the  
439 amount of microtubules, but not by stimulating the microtubule growth rate. Thus it  
440 presumably decreases the catastrophe frequency and/or it increases the rescue frequency.

441 To further confirm that increased levels of beta-Tubulin 97EF stabilize microtubules, we  
442 analyzed their colcemid sensitivity. Colcemid inhibits microtubule growth and  
443 depolymerizes microtubules at higher concentrations (Ravelli et al., 2004). Colcemid was  
444 found to have a more pronounced effect on hemocytes expressing *UAS-betaTub56D*  
445 compared to those expressing *UAS-betaTub97EF(4B)* (Fig. 6D). In *R-56D* hemocytes, anti-  
446 alpha-tubulin signals were drastically lower after one hour incubation in the presence of  
447 colcemid. In contrast, signals were still high in *R-97EF* hemocytes even after 2 hours of  
448 incubation although in a more patchy distribution. Analogous analyses after expression of  
449 beta-Tubulin 56D and 97EF with swapped C-terminal tails, indicated that the microtubule  
450 stabilizing effect is mediated by the beta-Tubulin 97EF core and not by its C-terminal tail  
451 (Fig. 6D). Our results support the notion that beta-Tubulin 97EF stabilizes microtubules.

452 The analysis of microtubules in hemocytes indicated that microtubules containing beta-  
453 Tubulin 97EF are more stable than those built primarily from the major embryonic  
454 maternally provided beta-Tubulin 56D. Accordingly, the hindgut microtubules of  
455 *betaTub97EF* mutants (containing only maternally derived beta-Tubulin 56D) are predicted  
456 to be less stable than those in wild-type control embryos (containing beta-Tubulin 56D and  
457 beta-Tubulin 97EF). To address this prediction, we performed microtubule depolymerization  
458 experiments with embryos with or without *betaTub97EF* function. For these experiments,  
459 we used vinblastine because it depolymerized microtubules in embryos more effectively  
460 than colcemid (data not shown). To enforce equal conditions during vinblastine treatment  
461 as well as during subsequent fixation and immunolabeling, embryos with and without



462 *betaTub97EF* function were combined into a pool before treatment onset. To identify the  
463 different genotypes during the microscopic analysis eventually, the embryos with  
464 *betaTub97EF* gene function had the *g-tdTomato-CenpC* marker gene, resulting in red  
465 fluorescent centromere signals. In contrast, the *betaTub97EF* mutants did not have this  
466 marker transgene. After vinblastine or mock treatment, embryos were stained with anti-  
467 alpha-tubulin and signal intensities were quantified. The quantification revealed that in the  
468 hindgut, vinblastine caused a significant reduction in the level of anti-alpha-tubulin signals  
469 but only in embryos lacking *betaTub97EF* function (Fig. 7). In contrast, in the tissues  
470 surrounding the hindgut and in the body muscles, vinblastine reduced the level of anti-  
471 alpha-tubulin signals to a comparable extent in embryos with and without *betaTub97EF*  
472 function (Fig. 7). These results indicate that microtubules in normal hindgut, where  
473 *betaTub97EF* expression is high, are more stable than in tissues, where *betaTub97EF* is at  
474 most marginally expressed. Moreover, this higher microtubule stability in the hindgut  
475 depends on *betaTub97EF* expression, as it is lost in *betaTub97EF* mutants.

476

## 477 Discussion

478 The molecular mechanisms allowing acclimation to ambient temperature fluctuations are  
479 poorly understood. Here we have identified *betaTub97EF* as a temperature responsive gene  
480 in *Drosophila melanogaster*. At low temperature, *betaTub97EF* expression is increased.  
481 However, at the optimal temperature, as well as at lower temperatures, *betaTub97EF* is not  
482 expressed ubiquitously but restricted in a range of tissues including gut epithelial cells and  
483 hemocytes. Mutations that eliminate *betaTub97EF* function have a surprisingly mild effect,  
484 presumably reflecting functional redundancy with other co-expressed beta-tubulin paralogs.  
485 But without beta-Tubulin 97EF, microtubules are less stable. Conversely, microtubules are  
486 stabilized by increased *betaTub97EF* expression. Moreover, within the well-tolerated  
487 temperature range, embryogenesis of *betaTub97EF* mutants is more cold- than heat-  
488 sensitive. Therefore, upregulation of *betaTub97EF* at low temperature might contribute to  
489 acclimation by stabilizing microtubules.

490 A detailed understanding of the *betaTub97EF* contribution to the success of  
491 embryogenesis specifically at the lower end of the temperature range compatible with  
492 completion of the entire life cycle will require further work. Lack of beta-Tubulin 97EF in the  
493 gut epithelia might impair yolk utilization during late embryogenesis at low temperature. It

494 might also affect hemocyte functions (Wood and Martin, 2017). Hemocytes are important  
495 for innate immunity, which is unlikely to be relevant for successful embryogenesis.  
496 However, they also provide functions essential for embryogenesis. They scavenge apoptotic  
497 corpses resulting from the abundant developmentally programmed cell death. Moreover,  
498 they are crucial for secretion and remodeling of much of the extracellular matrix in  
499 embryos.

500 Microtubules are ubiquitous and temperature change will affect them in all cells.  
501 Irrespective of temperature change, microtubule properties are carefully controlled in  
502 animal cells, not only by alterations in tubulin isoform composition, but also by myriads of  
503 interacting factors. Thereby their characteristics in different cell types and intercellular  
504 subsets are modified to serve a wide range of functions. Acclimation of these diverse  
505 microtubule systems to temperature change is therefore likely demanding and impossible to  
506 achieve simply and exclusively by global upregulation of a single tubulin paralog.  
507 Presumably, tissue-specific upregulation of *betaTub97EF* is one of many mechanisms for  
508 microtubule acclimation in *D. melanogaster*.

509 Beyond acclimation to low temperature, *betaTub97EF* expression occurs also at optimal  
510 and elevated growth temperatures. *betaTub97EF* is one of the five beta-tubulin paralogs  
511 present in the genome of *D. melanogaster*, which includes five alpha-tubulin paralogs. The  
512 human genome hosts almost twice as many alpha- and beta-tubulin genes (9 and 8,  
513 respectively) and genetic analysis during the last 10 years have uncovered an increasing  
514 number of disease-associated mutations primarily in the context of neurological disease and  
515 cancer (Bahi-Buisson et al., 2014; Ludueña and Banerjee, 2008; Wang et al., 2017).  
516 Characterization of these genes and associated phenotypes, also in mouse models, has fully  
517 confirmed the conclusions from pioneering analyses of tubulin paralog functions in *D.*  
518 *melanogaster*. Tubulin paralogs have distinct but often partially overlapping patterns of  
519 expression and functions. The understanding of how amino acid sequence alterations affect  
520 tubulin function has progressed slowly. Production of pure recombinant tubulin isoforms in  
521 quantities sufficient for studies of microtubule polymerization and dynamics *in vitro* has  
522 been achieved only very recently (Pamula et al., 2016; Sirajuddin et al., 2014; Ti et al., 2016;  
523 Valenstein and Roll-Mecak, 2016; Vemu et al., 2016; Widlund et al., 2012). As the  
524 microtubule interactome in cells is highly complex (Hughes et al., 2008; Yu et al., 2016)  
525 phenotypic analyses *in vivo* will remain important as well.

526 Here we have used a series of transgenes for *GAL4*-regulated expression of all the *D.*  
527 *melanogaster* beta-tubulin paralogs. As the transgenes are identical except for the coding  
528 sequences, differential effects most likely reflect functional specialization at the protein  
529 level. Expression with *ey-GAL4* (and additional drivers including *en-GAL4* and *da-GAL4*, data  
530 not shown) indicated that excess *betaTub97EF* is more toxic than that of the other beta-  
531 tubulin paralogs. Moreover, *betaTub97EF-4C* is more detrimental than *betaTub97EF-4B*.  
532 These two *betaTub97EF* isoforms, resulting from mutually exclusive splicing of the fourth  
533 exon, differ at 13 positions within an internal segment of 40 amino acids, but their N- and C-  
534 terminal regions are identical. Sequence divergence between tubulin paralogs is generally  
535 most extensive within the tails, in particular C-terminally where also several distinct post-  
536 translational modifications occur (Gadadhar et al., 2017; Janke, 2014; Yu et al., 2015).  
537 Therefore, the C-terminal tails (CTTs) are thought to make important paralog-specific  
538 contributions, as fully confirmed recently (Sirajuddin et al., 2014). Our comparison of the  
539 97EF and 56D beta-tubulins also revealed that CCTs contribute to paralog-specific function.  
540 While 56D with an 97EF-CTT behaved like normal 56D, 97EF with an 56D-CTT had a toxicity  
541 intermediate between 97EF and 56D, suggesting that the beta-Tubulin 97EF core and tail  
542 cooperate, as demonstrated most elegantly with the 56D and 85D paralogs (Popodi et al.,  
543 2008). Beyond CTT contributions, differences within the tubulin core were found to have  
544 more profound effects. The core is responsible for the characteristic microtubule stabilizing  
545 effect of beta-Tubulin 97EF in larval hemocytes. Similarly, a study with chimeric tail-  
546 swapped human beta-tubulins IIB and III concluded that differences between the cores were  
547 largely responsible for the different microtubule dynamics observed *in vitro* (Pamula et al.,  
548 2016).

549 Our results indicate that beta-Tubulin 97EF expression does not affect the microtubule  
550 growth rate but it results in microtubules that are less prone to destabilization by colcemid  
551 and vinblastine. As beta-Tubulin 97EF appears to be enriched in cortical microtubules, it  
552 might confer resistance against cortical factors that stimulate catastrophe. Cortical  
553 enrichment was apparent after double labeling of larval hemocytes with anti-alpha-tubulin  
554 and anti-beta-Tubulin 97EF. However, locally distinct epitope masking effects, for example  
555 by CTT-associated proteins or modifications, are clearly not excluded. Judging from the  
556 pattern of microtubules induced by beta-Tubulin 97EF overexpression in hemocytes, this  
557 tubulin might also facilitate microtubule bundling (Molodtsov et al., 2016). Interestingly,

558 while ectopic *betaTub60D* expression in the germline did not affect oogenesis, *betaTub97EF*  
559 specifically blocked dumping of nurse cell cytoplasm into the oocyte during mid-oogenesis,  
560 i.e. long after the onset of ectopic expression. Dumping is critically dependent on actin and  
561 myosin. Microtubule inhibitors, which clearly inhibit some aspects of transport from nurse  
562 cells to oocyte, do not block the dumping process (Gutzeit, 1986; Lu et al., 2016; Roth and  
563 Lynch, 2009; Wheatley et al., 1995, Huelsmann, 2013 #7420). An excess of cortical  
564 microtubule bundles caused by ectopic beta-Tubulin 97EF might therefore inhibit dumping  
565 by interference with normal myosin-mediated contraction of the cortical actin network in  
566 nurse cells. Evidently, further analyses will be required to evaluate our speculative  
567 proposals. It is clear, however, that beta-Tubulin 97EF has interesting properties that are  
568 remarkably distinct from those of other *D. melanogaster* paralogs.

569

## 570 **Materials and methods**

### 571 ***Drosophila* strains**

572 Several stocks were obtained from the Bloomington *Drosophila* Stock Center (Indiana  
573 University, Bloomington, IN, USA) and the Kyoto Stock Center (Kyoto Institute of  
574 Technology, Kyoto, JP): *betaTub97EF<sup>MiMIC</sup>* (#41519) (Venken et al., 2011),  
575 *betaTub97EF<sup>MBO1877</sup>* (# 24452) and *betaTub97EF<sup>MBO3812</sup>* (#24275) (Metaxakis et al., 2005),  
576 *betaTub56D<sup>EY12300</sup>* (#20734) (Bellen et al., 2004); *Df(2R)BSC782* (#27354) and *Df(3R)BSC460*  
577 (#24964) (Cook et al., 2012), *betaTub56D<sup>NP0949</sup>* (#103830) (Hayashi et al., 2002),  
578 *betaTub97EF<sup>EGFP</sup>* was generated as described in further detail (Supplementary Information).  
579 Two strains with *UAS-Tub xy* transgenes were obtained from FlyORF (University of Zurich,  
580 Zurich, Switzerland): *M{UAS-betaTub85D.ORF}ZH-86Fb* (F001298) and *M{UAS-*  
581 *betaTub97EF(4B).ORF}ZH-86Fb* (F001587) (Bischof et al., 2013). Additional *UAS-Tub* lines  
582 (*M{UAS-betaTub56D.ORF}ZH-86Fb*, *M{UAS-betaTub60D.ORF}ZH-86Fb*, *M{UAS-*  
583 *betaTub65B.ORF}ZH-86Fb*, *M{UAS-betaTub97EF(4C).ORF}ZH-86Fb*, *M{UAS-betaTub56D-*  
584 *97EFtail.ORF}ZH-86Fb* *M{UAS-betaTub97EF(4B)-56Dtail.ORF}ZH-86Fb*) as well as the *UASp-*  
585 *Tub* lines *M{UASp-betaTub97EF(4B).ORF}ZH-86Fb* and *M{UASp-betaTub60D.ORF}ZH-86Fb*  
586 were generated as described in further detail (Supplementary Information). *UASp-EB1-GFP*  
587 (Jankovics and Brunner, 2006) was kindly provided by D. Brunner (University of Zurich,  
588 Zurich, Switzerland). The GAL4 driver and marker lines have been described previously: *ey-*  
589 *GAL4 (5/8)* (Hazelett et al., 1998), *mat  $\alpha$ 4-GAL-VP16(V2H)* (Hacker and Perrimon, 1998),

590 *alphaTub84BP-GAL4 (LL7) (#5138)* (Lee and Luo, 1999) and *gi2xtdTomato-Cenp-C II.3*  
591 (Althoff et al., 2012).

592 For analysis of the extent of *betaTub56D* mutant development supported by other beta-  
593 tubulin paralogs, the following crosses were set up. Virgins *Df(2R)BSC782/CyO, Dfd-YFP;*  
594 *UAS-betaTubXY* with XY = 56D, 60D, 65B, 85D, 97EF(4C) or 97EF(4C) were crossed with  
595 males *w\**; *betaTub56D<sup>NP0949</sup>/CyO, Dfd-GMR-nvYFP; alphaTub84BP-GAL4/TM6B, Hu, Dfd-YFP.*  
596 Eggs were collected from these crosses on either apple agar plates or in tubes with standard  
597 fly food. Collection plates were inspected at intervals under a fluorescence  
598 stereomicroscope allowing identification of larvae without the *Dfd-YFP* balancer  
599 chromosomes.

600 As control strain, *w* was used. *betaTub97EF<sup>MIMIC</sup>* was backcrossed for four generations to *w*  
601 before comparison of the temperature sensitivity of development.

602 The rate of larval hatching from eggs was determined as described previously  
603 (Radermacher et al., 2014). Eggs were collected during 60 minutes on apple agar plates at  
604 25°C and aged at this temperature for 5 hours. The collection plates with the eggs were then  
605 divided into sectors. The eggs on one of the sectors were fixed immediately with methanol  
606 and stained with a DNA stain to determine the fraction of unfertilized eggs. The other  
607 sectors were shifted to different temperatures and the fraction of hatched and unhatched  
608 eggs was determined eventually with the help of a stereomicroscope. The hatch rate was  
609 calculated as the ratio of the number of hatched eggs to the total number of eggs deposited  
610 on the sector minus the number of unfertilized eggs. For the analysis of the rate of  
611 development to the adult stage, eggs were also collected during 60 minutes at 25°C  
612 followed by ageing at this temperature for 5 hours. Sectors of the collection plates with eggs  
613 that had been counted were then separated into bottles containing standard fly food and  
614 shifted to different temperatures. The number of eclosed flies was determined eventually.  
615 The eclosion rate was calculated as a ratio between the number of eclosed flies to the total  
616 number of eggs minus the number of unfertilized embryos.

617

## 618 **Transcript analyses**

619 The analysis of temperature effects on the transcriptome of cultured cells will be described  
620 in detail elsewhere. Data shown here was obtained with S2R+ cells which were cultured as  
621 described previously (Radermacher et al., 2014). Aliquots were shifted 24 hours after plating

622 at 25°C to different temperatures (11, 14, 25 and 30°C). 24 hours later RNA was extracted,  
623 followed by probe synthesis and microarray hybridization (*Drosophila* gene expression  
624 4x44K microarrays, G2519F-021791, Agilent Technologies). Three independent replicas were  
625 analyzed and after normalization of signal intensities across replicates average hybridization  
626 signals were determined. In contrast to all other tubulin paralogs, signals for the testis-  
627 specific *betaTub85D* paralog were too low to be included in the S2R+ transcriptome analysis  
628 (Fig. 1A).

629 For qRT-PCR analysis, S2R+ cells were treated in the same way as for the microarray  
630 experiments. For qRT-PCR analysis with *w*<sup>1</sup> embryos, eggs were collected at 25°C for 3  
631 hours. After additional ageing at 25°C for 3 hours, they were shifted to 14, 25 and 30°C for  
632 40, 10 or 8 hours, respectively. As a result, embryos were all at stage 16 of embryogenesis  
633 irrespective of the applied temperature regime. An aliquot of each sample was fixed for  
634 controlling the developmental stage after DNA staining by microscopy. Further details  
635 concerning the qRT-PCR analyses, including primer sequences, are described in  
636 Supplementary Information.

637

### 638 **Antibodies**

639 Detailed information on all antibodies and dilutions applied during immunoblotting and  
640 immunolabeling is given in the Supplementary Information. The rabbit antibodies against  
641 beta-Tubulin 97EF were generated with a synthetic peptide corresponding to last 17 amino  
642 acids (AEQEGYESEVLQNGNGE) coupled to KHL (Moravian Biotechnology, Brno, Czech  
643 Republic). Antibodies were affinity purified. Rabbit antibodies against beta-Tubulin 60D  
644 (Leiss et al., 1988) were kindly provided by R. Renkawitz-Pohl (University of Marburg,  
645 Marburg, Germany).

646

### 647 **Immunoblotting**

648 Total extracts from cells, embryos, larvae and adults were prepared as described in further  
649 detail in the Supplementary Information and resolved by gel electrophoresis. Embryos and  
650 larvae aged at different temperatures were processed with solutions that had been pre-  
651 equilibrated to the temperatures used for aging. For probing samples with different anti-  
652 tubulin antibodies, separate gels and immunoblots were used for each antibody in order to  
653 avoid potential masking effects that might arise during serial probing of a single

654 immunoblot. Immunoblot signals were developed using chemiluminescence (Amersham  
655 ECL, GE Health Care Life Sciences) and captured using a CCD camera. For quantification of  
656 immunoblot signals a dilution series of a reference extract was resolved along with the test  
657 samples. Quantification of signals by densitometry was done with ImageJ as described  
658 previously (Radermacher et al., 2014).

659

#### 660 **Microscopic analyses**

661 Embryos were immunolabeled as described before (Radermacher et al., 2014). For  
662 vinblastine treatment, *gi2xtdTomato-Cenp-C* II.3 and *betaTub97EF<sup>MIMIC</sup>* embryos were  
663 collected and aged to 11-13 hours AED. Pooled embryos were dechorionated with 3%  
664 sodium hypochlorite, washed extensively with 0.7% NaCl, 0.07% Triton X-100 and  
665 transferred into an Eppendorf tube. 1.5 ml of a 1:1 mixture of heptane and Schneider's  
666 medium were added. Moreover, 3  $\mu$ l of a vinblastine (Sigma, V1377) stock solution (5 mM in  
667 methanol) or 3  $\mu$ l methanol in case of control aliquots were added. The Eppendorf tubes  
668 were slowly rotated end over end for 20 minutes at room temperature. Thereafter, embryos  
669 were fixed with methanol.

670 Preparation and immunolabeling of organs from larvae and adults was performed using  
671 standard procedures as described in further detail in Supplementary Information.

672 Hemocytes were isolated as previously described (Sampson and Williams, 2012) using  
673 second instar larvae (*R-56D*, *S-56D*, *R-97EF*, *S-97EF*) or first instar larvae  
674 (*betaTub56D<sup>NP0949</sup>/Df(2R)BSC782*). The larvae were collected in a drop of 150  $\mu$ l Schneider's  
675 medium on a glass slide that had been pre-coated with 0.5 mg/ml concanavaline A (Sigma,  
676 C7275) in phosphate buffer (9 mM NaH<sub>2</sub>PO<sub>4</sub>, 1 mM Na<sub>2</sub>HPO<sub>4</sub>, 1 mM CaCl<sub>2</sub>, pH 6.0). Larval  
677 cuticles were gently ruptured with forceps. This allowed migration of hemocytes out of the  
678 larvae and their subsequent initial attachment to the cover slip. After 15 minutes at room  
679 temperature, larvae were discarded. Before fixation or live imaging, hemocytes were  
680 allowed to spread during a 60 minute incubation at 25°C. In case of colcemid treatment, the  
681 compound was added to final concentration 10  $\mu$ M in Schneider's medium. Hemocytes  
682 were fixed either with 4% paraformaldehyde in phosphate buffered saline (PBS) at room  
683 temperature or (for Fig. 6D) with methanol containing 1 mM EGTA for 10 minutes at -20°C  
684 (Hoogenraad et al., 2000).



685 Images from fixed samples were acquired with an Olympus FluoView 1000 laser-scanning  
686 confocal microscope with a 60x/1.35 objective (Figs 2C, 3D, 4C,D, 6D,E, 7A,B), with a 40x/1.3  
687 objective (Sup. Figs. 3B,C, 5) or with a Zeiss Cell Observer HS wide-field microscope with a  
688 63x/1.4 objective (Figs 2B,D, 6A,B), or with 16x/0.5 objective (Fig. 5C). Z-stacks were  
689 acquired. Single sections are presented in all images, except in Fig. 3A, where maximum  
690 intensity projections of relevant regions made with Imaris (Bitplane) are displayed. The  
691 intensities of anti-tubulin signals in hindgut in Fig. 4C-E were measured with ImageJ in  
692 maximum projections of 5 slices taken within the middle of the hindgut tube. The intensities  
693 of anti-alpha-tubulin staining in hindgut and other embryonic tissues (Fig. 7) were measured  
694 in single slices with ImageJ after manual selection of the regions of interest. Image z-stacks  
695 of eyes (Fig. 5B) were acquired with a Zeiss AxioCam HRc camera and converted into  
696 extended focus images using Helicon Focus Software (Helicon Soft Ltd.).

697 Time lapse imaging of EB1-GFP comets in live hemocytes was done with a VisiScope  
698 spinning disc confocal microscope (Visitron) on an Olympus IX83 microscope stand with a  
699 100x/1.4 objective. Three sections with 0.1  $\mu\text{m}$  spacing were acquired at 1 sec intervals.  
700 Signals in case of *R-97EF* and *S-97EF* were deconvolved using Huygens Software (Scientific  
701 Volume Imaging b.v.). Quantification of microtubule dynamics after sum of intensity  
702 projections was done with u-track software (Jaqaman et al., 2008). To differentiate the  
703 moving EB1-GFP comet signals from the stationary EB1-GFP signals characteristically present  
704 in the *R-97EF* and *S-97EF* hemocytes along microtubule bundles, image sequences were  
705 processed arithmetically in ImageJ as follows. In a first variant image sequence, the first four  
706 frames were deleted. The last four frames were deleted in a second variant. By subtracting  
707 variant 2 from variant 1, we arrived at an image sequence from which background was  
708 subtracted (Image J, rolling ball radius 2 pixels) before analysis with u-track.

709 Characterization of the hindgut ultrastructure in  $w^1$  and *betaTub97EF<sup>MiMIC</sup>* after  
710 development at 25°C to 15-16 hours AED by transmission electron microscopy and FIBSEM  
711 was achieved as described in detail in Supplementary information.

712

## 713 **Acknowledgements**

714 We thank Renate Renkawitz-Pohl for anti-beta-Tubulin 60D and Nikola Linsi for his  
715 contributions to antibody characterization. We are also grateful to Rita Lecca and the  
716 Functional Genomics Center Zurich for supporting microarray hybridizations, to Martin

717 Moser for qRT-PCR support, as well as to Andres Käch and the Center for Microscopy and  
718 Image Analysis (University of Zurich).

719

720 **Competing interests**

721 No competing interests declared.

722

723 **Author contributions**

724 F.M. performed all experiments (except microarray analyses and part of electron  
725 microscopy), analyzed data, designed experiments together with C.F.L. and contributed to  
726 manuscript writing. F.B. performed expression profiling. J.B. supported the generation of  
727 transgenic strains. M.K. performed electron microscopy, C.F.L conceived and supervised the  
728 study, analyzed data, and wrote the manuscript.

729

730 **Funding**

731 This work was supported by the Swiss National Science Foundation (grant 31003A\_152667  
732 to C.F.L.).

733

734 **References**

- 735 **Althoff, F., Karess, R.E. and Lehner, C.F.** (2012). Spindle checkpoint-independent inhibition of  
736 mitotic chromosome segregation by *Drosophila* Mps1. *Mol Biol Cell* **23**, 2275-2291.
- 737 **Bahi-Buisson, N., Poirier, K., Fourniol, F., Saillour, Y., Valence, S., Lebrun, N., Hully, M., Fallet**  
738 **Bianco, C., Boddaert, N., Elie, C., et al.** (2014). The wide spectrum of tubulinopathies: what  
739 are the key features for the diagnosis? *Brain* **137**, 1676-1700.
- 740 **Bellen, H.J., Levis, R.W., Liao, G., He, Y., Carlson, J.W., Tsang, G., Evans-Holm, M., Hiesinger, P.R.,**  
741 **Schulze, K.L., Rubin, G.M., et al.** (2004). The BDGP gene disruption project: single  
742 transposon insertions associated with 40% of *Drosophila* genes. *Genetics* **167**, 761-781.
- 743 **Bischof, J., Bjorklund, M., Furger, E., Schertel, C., Taipale, J. and Basler, K.** (2013). A versatile  
744 platform for creating a comprehensive UAS-ORFeome library in *Drosophila*. *Development*  
745 **140**, 2434-2442.
- 746 **Blose, S.H., Meltzer, D.I. and Feramisco, J.R.** (1984). 10-nm filaments are induced to collapse in  
747 living cells microinjected with monoclonal and polyclonal antibodies against tubulin. *The*  
748 *Journal of Cell Biology* **98**, 847-858.
- 749 **Bossing, T., Barros, Claudia S., Fischer, B., Russell, S. and Shepherd, D.** (2012). Disruption of  
750 Microtubule Integrity Initiates Mitosis during CNS Repair. *Developmental Cell* **23**, 433-440.
- 751 **Breitling, F. and Little, M.** (1986). Carboxy-terminal regions on the surface of tubulin and  
752 microtubules epitope locations of YOL1/34, DM1A and DM1B. *Journal of Molecular Biology*  
753 **189**, 367-370.
- 754 **Buttgereit, D., Leiss, D., Michiels, F. and Renkawitz-Pohl, R.** (1991). During *Drosophila*  
755 embryogenesis the beta 1 tubulin gene is specifically expressed in the nervous system and  
756 the apodemes. *Mech Dev* **33**, 107-118.
- 757 **Buttgereit, D., Paululat, A. and Renkawitz-Pohl, R.** (1996). Muscle development and attachment to  
758 the epidermis is accompanied by expression of beta 3 and beta 1 tubulin isoforms,  
759 respectively. *The international Journal of developmental Biology* **40**, 189-196.
- 760 **Cherbas, L., Willingham, A., Zhang, D., Yang, L., Zou, Y., Eads, B.D., Carlson, J.W., Landolin, J.M.,**  
761 **Kapranov, P., Dumais, J., et al.** (2011). The transcriptional diversity of 25 *Drosophila* cell  
762 lines. *Genome Research* **21**, 301-314.
- 763 **Chiappori, F., Pucciarelli, S., Merelli, I., Ballarini, P., Miceli, C. and Milanese, L.** (2012). Structural  
764 thermal adaptation of beta-tubulins from the Antarctic psychrophilic protozoan *Euplotes*  
765 *focardii*. *Proteins* **80**, 1154-1166.
- 766 **Chu, D.T.W. and Klymkowsky, M.W.** (1989). The appearance of acetylated  $\alpha$ -tubulin during early  
767 development and cellular differentiation in *Xenopus*. *Developmental Biology* **136**, 104-117.
- 768 **Cleveland, D.W.** (1988). Autoregulated instability of tubulin mRNAs: a novel eukaryotic regulatory  
769 mechanism. *Trends in Biochemical Sciences* **13**, 339-343.
- 770 **Cook, R.K., Christensen, S.J., Deal, J.A., Coburn, R.A., Deal, M.E., Gresens, J.M., Kaufman, T.C. and**  
771 **Cook, K.R.** (2012). The generation of chromosomal deletions to provide extensive coverage  
772 and subdivision of the *Drosophila melanogaster* genome. *Genome Biol* **13**, R21.
- 773 **Correia, J.J. and Williams, J., R.C.** (1983). Mechanisms of Assembly and Disassembly of  
774 Microtubules. *Annual Review of Biophysics and Bioengineering* **12**, 211-235.
- 775 **Coutelis, J.B., González - Morales, N., Géminard, C. and Noselli, S.** (2014). Diversity and  
776 convergence in the mechanisms establishing L/R asymmetry in metazoa. *EMBO reports* **15**,  
777 926-937.
- 778 **Delphin, C., Bouvier, D., Seggio, M., Couriol, E., Saoudi, Y., Denarier, E., Bosc, C., Valiron, O., Bisbal,**  
779 **M., Arnal, I., et al.** (2012). MAP6-F is a temperature sensor that directly binds to and  
780 protects microtubules from cold-induced depolymerization. *J Biol Chem* **287**, 35127-35138.
- 781 **Denlinger, D.L. and Lee, R.E.** (2010). *Low temperature biology of insects*. Cambridge: Cambridge  
782 University Press.
- 783 **Detrich, H.W., 3rd, Parker, S.K., Williams, R.C., Jr., Nogales, E. and Downing, K.H.** (2000). Cold  
784 adaptation of microtubule assembly and dynamics. Structural interpretation of primary

- 785 sequence changes present in the alpha- and beta-tubulins of Antarctic fishes. *J Biol Chem*  
786 **275**, 37038-37047.
- 787 **Findeisen, P., Mühlhausen, S., Dempewolf, S., Hertzog, J., Zietlow, A., Carlomagno, T. and Kollmar,**  
788 **M.** (2014). Six Subgroups and Extensive Recent Duplications Characterize the Evolution of  
789 the Eukaryotic Tubulin Protein Family. *Genome Biology and Evolution* **6**, 2274-2288.
- 790 **Fuller, M.T., Caulton, J.H., Hutchens, J.A., Kaufman, T.C. and Raff, E.C.** (1988). Mutations that  
791 encode partially functional beta 2 tubulin subunits have different effects on structurally  
792 different microtubule arrays. *The Journal of Cell Biology* **107**, 141-152.
- 793 **Fygenson, D.K., Braun, E. and Libchaber, A.** (1994). Phase diagram of microtubules. *Physical Review*  
794 *E* **50**, 1579-1588.
- 795 **Gadadhar, S., Bodakuntla, S., Natarajan, K. and Janke, C.** (2017). The tubulin code at a glance.  
796 *Journal of Cell Science* **130**, 1347-1353.
- 797 **Gasch, A.P., Spellman, P.T., Kao, C.M., Carmel-Harel, O., Eisen, M.B., Storz, G., Botstein, D. and**  
798 **Brown, P.O.** (2000). Genomic Expression Programs in the Response of Yeast Cells to  
799 Environmental Changes. *Molecular Biology of the Cell* **11**, 4241-4257.
- 800 **Graveley, B.R., Brooks, A.N., Carlson, J.W., Duff, M.O., Landolin, J.M., Yang, L., Artieri, C.G., van**  
801 **Baren, M.J., Boley, N., Booth, B.W., et al.** (2011). The developmental transcriptome of  
802 *Drosophila melanogaster*. *Nature* **471**, 473-479.
- 803 **Gutzeit, H.** (1986). The role of microtubules in the differentiation of ovarian follicles during  
804 vitellogenesis in *Drosophila*. *Roux.Arch.Dev.Biol.* **195**, 173-181.
- 805 **Hacker, U. and Perrimon, N.** (1998). DRhoGEF2 encodes a member of the Dbl family of oncogenes  
806 and controls cell shape changes during gastrulation in *Drosophila*. *Genes Dev* **12**, 274-284.
- 807 **Hayashi, S., Ito, K., Sado, Y., Taniguchi, M., Akimoto, A., Takeuchi, H., Aigaki, T., Matsuzaki, F.,**  
808 **Nakagoshi, H., Tanimura, T., et al.** (2002). GETDB, a database compiling expression patterns  
809 and molecular locations of a collection of gal4 enhancer traps. *Genesis* **34**, 58-61.
- 810 **Hayward, S.A., Murray, P.A., Gracey, A.Y. and Cossins, A.R.** (2007). Beyond the lipid hypothesis:  
811 mechanisms underlying phenotypic plasticity in inducible cold tolerance. *Adv Exp Med Biol*  
812 **594**, 132-142.
- 813 **Hazelett, D.J., Bourouis, M., Walldorf, U. and Treisman, J.E.** (1998). decapentaplegic and wingless  
814 are regulated by eyes absent and eyegone and interact to direct the pattern of retinal  
815 differentiation in the eye disc. *Development* **125**, 3741-3751.
- 816 **Hoogenraad, C.C., Akhmanova, A., Grosveld, F., De Zeeuw, C.I. and Galjart, N.** (2000). Functional  
817 analysis of CLIP-115 and its binding to microtubules. *Journal of Cell Science* **113**, 2285-2297.
- 818 **Hoyle, H.D. and Raff, E.C.** (1990). Two *Drosophila* beta tubulin isoforms are not functionally  
819 equivalent. *J. Cell Biol.* **111**, 1009-1026.
- 820 **Hughes, J.R., Meireles, A.M., Fisher, K.H., Garcia, A., Antrobus, P.R., Wainman, A., Zitzmann, N.,**  
821 **Deane, C., Ohkura, H. and Wakefield, J.G.** (2008). A Microtubule Interactome: Complexes  
822 with Roles in Cell Cycle and Mitosis. *PLOS Biology* **6**, e98.
- 823 **Iwaki, D.D. and Lengyel, J.A.** (2002). A Delta–Notch signaling border regulated by Engrailed/Invected  
824 repression specifies boundary cells in the *Drosophila* hindgut. *Mechanisms of Development*  
825 **114**, 71-84.
- 826 **Janke, C.** (2014). The tubulin code: Molecular components, readout mechanisms, and functions. *The*  
827 *Journal of Cell Biology* **206**, 461-472.
- 828 **Jankovics, F. and Brunner, D.** (2006). Transiently Reorganized Microtubules Are Essential for  
829 Zippering during Dorsal Closure in *Drosophila melanogaster*. *Developmental Cell* **11**, 375-  
830 385.
- 831 **Jaqaman, K., Loerke, D., Mettlen, M., Kuwata, H., Grinstein, S., Schmid, S.L. and Danuser, G.**  
832 (2008). Robust single-particle tracking in live-cell time-lapse sequences. *Nat Meth* **5**, 695-  
833 702.
- 834 **Kemphues, K.J., Kaufman, T.C., Raff, R.A. and Raff, E.C.** (1982). The testis-specific  $\beta$ -tubulin subunit  
835 in *drosophila melanogaster* has multiple functions in spermatogenesis. *Cell* **31**, 655-670.

- 836 **Kimble, M., Dettman, R.W. and Raff, E.C.** (1990). The beta-3-tubulin gene of *Drosophila-*  
837 *melanogaster* is essential for viability and fertility. *Genetics* **126**, 991-1005.
- 838 **Kimble, M., Incardona, J. and Raff, E.** (1989). A variant beta-tubulin isoform of *Drosophila*  
839 *melanogaster* (beta 3) is expressed primarily in tissues of mesodermal origin in embryos and  
840 pupae, and is utilized in populations of transient microtubules. *Developmental Biology* **131**,  
841 415-429.
- 842 **Kumichel, A. and Knust, E.** (2014). Apical Localisation of Crumbs in the Boundary Cells of the  
843 *Drosophila* Hindgut Is Independent of Its Canonical Interaction Partner Stardust. *PLoS ONE* **9**,  
844 e94038.
- 845 **Lee, T. and Luo, L.** (1999). Mosaic Analysis with a Repressible Cell Marker for Studies of Gene  
846 Function in Neuronal Morphogenesis. *Neuron* **22**, 451-461.
- 847 **Leiss, D., Hinz, U., Gasch, A., Mertz, R. and Renkawitz-Pohl, R.** (1988). Beta 3 tubulin expression  
848 characterizes the differentiating mesodermal germ layer during *Drosophila* embryogenesis.  
849 *Development* **104**, 525-531.
- 850 **Leśniewska, K., Warbrick, E. and Ohkura, H.** (2014). Peptide aptamers define distinct EB1- and EB3-  
851 binding motifs and interfere with microtubule dynamics. *Molecular Biology of the Cell* **25**,  
852 1025-1036.
- 853 **Lu, W., Winding, M., Lakonishok, M., Wildonger, J. and Gelfand, V.I.** (2016). Microtubule-  
854 microtubule sliding by kinesin-1 is essential for normal cytoplasmic streaming in *Drosophila*  
855 oocytes. *Proceedings of the National Academy of Sciences* **113**, E4995-E5004.
- 856 **Ludueña, R. and Banerjee, A.** (2008). The isotypes of tubulin. In *The Role of Microtubules in Cell*  
857 *Biology, Neurobiology, and Oncology* (ed. T. Fojo), pp. 123–175. New York, NY: Humana  
858 Press.
- 859 **Metaxakis, A., Oehler, S., Klinakis, A. and Savakis, C.** (2005). Minos as a genetic and genomic tool in  
860 *Drosophila melanogaster*. *Genetics* **171**, 571-581.
- 861 **Mimori-Kiyosue, Y., Shiina, N. and Tsukita, S.** (2000). The dynamic behavior of the APC-binding  
862 protein EB1 on the distal ends of microtubules. *Current Biology* **10**, 865-868.
- 863 **Mitchison, T. and Kirschner, M.** (1984). Dynamic instability of microtubule growth. *Nature* **312**, 237-  
864 242.
- 865 **Modig, C., Wallin, M. and Olsson, P.E.** (2000). Expression of cold-adapted beta-tubulins confer cold-  
866 tolerance to human cellular microtubules. *Biochem Biophys Res Commun* **269**, 787-791.
- 867 **Molodtsov, M.I., Mieck, C., Dobbelaere, J., Dammermann, A., Westermann, S. and Vaziri, A.**  
868 (2016). A Force-Induced Directional Switch of a Molecular Motor Enables Parallel  
869 Microtubule Bundle Formation. *Cell* **167**, 539-552.e514.
- 870 **Nogales, E. and Zhang, R.** (2016). Visualizing Microtubule Structural Transitions and Interactions  
871 with Associated Proteins. *Current opinion in structural biology* **37**, 90-96.
- 872 **Pamula, M.C., Ti, S.-C. and Kapoor, T.M.** (2016). The structured core of human  $\beta$  tubulin confers  
873 isotype-specific polymerization properties. *The Journal of Cell Biology* **213**, 425-433.
- 874 **Popodi, E.M., Hoyle, H.D., Turner, F.R. and Raff, E.C.** (2008). Cooperativity between the  $\beta$ -tubulin  
875 carboxy tail and the body of the molecule is required for microtubule function. *Cell Motility*  
876 *and the Cytoskeleton* **65**, 955-963.
- 877 **Radermacher, P.T., Myachina, F., Bosshardt, F., Pandey, R., Mariappa, D., Muller, H.A. and Lehner,**  
878 **C.F.** (2014). O-GlcNAc reports ambient temperature and confers heat resistance on  
879 ectotherm development. *Proc Natl Acad Sci U S A* **111**, 5592-5597.
- 880 **Ravelli, R.B.G., Gigant, B., Curmi, P.A., Jourdain, I., Lachkar, S., Sobel, A. and Knossow, M.** (2004).  
881 Insight into tubulin regulation from a complex with colchicine and a stathmin-like domain.  
882 *Nature* **428**, 198-202.
- 883 **Roth, S. and Lynch, J.A.** (2009). Symmetry Breaking During *Drosophila* Oogenesis. *Cold Spring Harbor*  
884 *perspectives in biology* **1**.
- 885 **Rudolf, A., Buttgereit, D., Rexer, K.-H. and Renkawitz-Pohl, R.** (2012). The syncytial visceral and  
886 somatic musculature develops independently of  $\beta$ 3-Tubulin during *Drosophila*



- 887 embryogenesis, while maternally supplied  $\beta$ 1-Tubulin is stable until the early steps of  
888 myoblast fusion. *European Journal of Cell Biology* **91**, 192-203.
- 889 **Sampson, C.J. and Williams, M.J.** (2012). Protocol for Ex Vivo Incubation of Drosophila Primary Post-  
890 embryonic Haemocytes for Real-Time Analyses. In *Rho GTPases: Methods and Protocols* (ed.  
891 F. Rivero), pp. 359-367. New York, NY: Springer New York.
- 892 **Schulman, V.K., Folker, E.S. and Baylies, M.K.** (2013). A method for reversible drug delivery to  
893 internal tissues of Drosophila embryos. *Fly* **7**, 193-203.
- 894 **Simcox, A., Mitra, S., Truesdell, S., Paul, L., Chen, T., Butchar, J.P. and Justiniano, S.** (2008). Efficient  
895 genetic method for establishing Drosophila cell lines unlocks the potential to create lines of  
896 specific genotypes. *PLoS Genet* **4**, e1000142.
- 897 **Sirajuddin, M., Rice, L.M. and Vale, R.D.** (2014). Regulation of microtubule motors by tubulin  
898 isotypes and post-translational modifications. *Nat Cell Biol* **16**, 335-344.
- 899 **Soplop, N.H., Cheng, Y.-S. and Kramer, S.G.** (2012). Roundabout is required in the visceral  
900 mesoderm for proper microvillus length in the hindgut epithelium. *Developmental Dynamics*  
901 **241**, 759-769.
- 902 **Tartaglia, L.J. and Shain, D.H.** (2008). Cold-adapted tubulins in the glacier ice worm, *Mesenchytraeus*  
903 *solifugus*. *Gene* **423**, 135-141.
- 904 **Taymaz-Nikerel, H., Cankorur-Cetinkaya, A. and Kirdar, B.** (2016). Genome-Wide Transcriptional  
905 Response of *Saccharomyces cerevisiae* to Stress-Induced Perturbations. *Frontiers in*  
906 *Bioengineering and Biotechnology* **4**, 17.
- 907 **Ti, S.-C., Pamula, M.C., Howes, S.C., Duellberg, C., Cade, N.I., Kleiner, R.E., Forth, S., Surrey, T.,**  
908 **Nogales, E. and Kapoor, T.M.** (2016). Mutations in Human Tubulin Proximal to the Kinesin-  
909 Binding Site Alter Dynamic Instability at Microtubule Plus- and Minus-Ends. *Developmental*  
910 *Cell* **37**, 72-84.
- 911 **Valenstein, M.L. and Roll-Mecak, A.** (2016). Graded Control of Microtubule Severing by Tubulin  
912 Glutamylation. *Cell* **164**, 911-921.
- 913 **Vemu, A., Atherton, J., Spector, J.O., Szyk, A., Moores, C.A. and Roll-Mecak, A.** (2016). Structure  
914 and Dynamics of Single-isoform Recombinant Neuronal Human Tubulin. *Journal of Biological*  
915 *Chemistry* **291**, 12907-12915.
- 916 **Venken, K.J., Schulze, K.L., Haelterman, N.A., Pan, H., He, Y., Evans-Holm, M., Carlson, J.W., Levis,**  
917 **R.W., Spradling, A.C., Hoskins, R.A., et al.** (2011). MiMIC: a highly versatile transposon  
918 insertion resource for engineering *Drosophila melanogaster* genes. *Nat Methods* **8**, 737-743.
- 919 **Wang, W., Zhang, H., Wang, X., Patterson, J., Winter, P., Graham, K., Ghosh, S., Lee, J.C., Katsetos,**  
920 **C.D., Mackey, J.R., et al.** (2017). Novel mutations involving  $\beta$ I-,  $\beta$ IIA-, or  $\beta$ IVB-tubulin  
921 isotypes with functional resemblance to  $\beta$ III-tubulin in breast cancer. *Protoplasma* **254**,  
922 1163-1173.
- 923 **Wheatley, S., Kulkarni, S. and Karess, R.** (1995). *Drosophila* nonmuscle myosin-ii is required for  
924 rapid cytoplasmic transport during oogenesis and for axial nuclear migration in early  
925 embryos. *Development* **121**, 1937-1946.
- 926 **Widlund, P.O., Podolski, M., Reber, S., Alper, J., Storch, M., Hyman, A.A., Howard, J. and Drechsel,**  
927 **D.N.** (2012). One-step purification of assembly-competent tubulin from diverse eukaryotic  
928 sources. *Molecular Biology of the Cell* **23**, 4393-4401.
- 929 **Wood, W. and Martin, P.** (2017). Macrophage Functions in Tissue Patterning and Disease: New  
930 Insights from the Fly. *Developmental Cell* **40**, 221-233.
- 931 **Yu, I., Garnham, C.P. and Roll-Mecak, A.** (2015). Writing and Reading the Tubulin Code. *Journal of*  
932 *Biological Chemistry* **290**, 17163-17172.
- 933 **Yu, N., Signorile, L., Basu, S., Ottema, S., Lebbink, J.H.G., Leslie, K., Smal, I., Dekkers, D., Demmers,**  
934 **J. and Galjart, N.** (2016). Isolation of Functional Tubulin Dimers and of Tubulin-Associated  
935 Proteins from Mammalian Cells. *Current Biology* **26**, 1728-1736.
- 936 **Zhang, R., Alushin, G.M., Brown, A. and Nogales, E.** (2015). Mechanistic Origin of Microtubule  
937 Dynamic Instability and Its Modulation by EB Proteins. *Cell* **162**, 849-859.

938 **Figure legends**

Myachina et al., Fig. 1

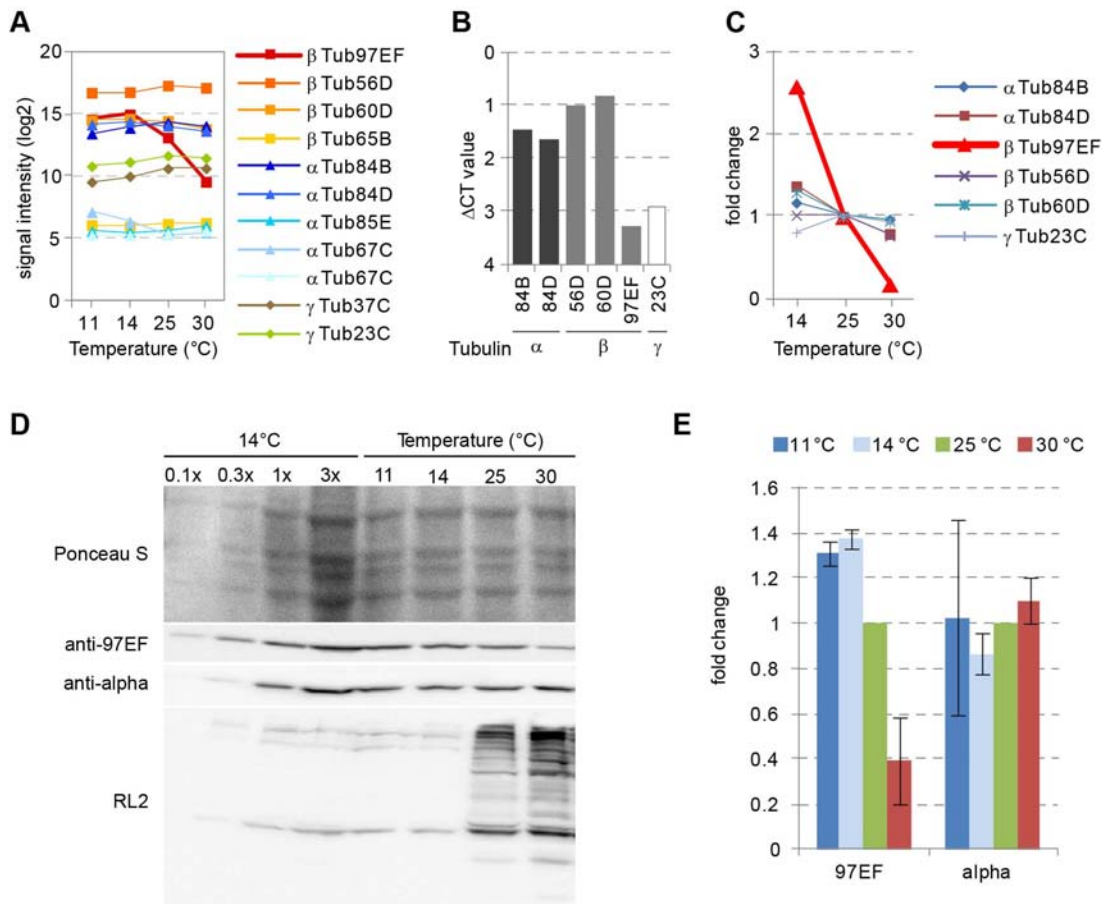

939

940

941 **Fig. 1. *betaTub97EF* expression is induced at low temperature.** The effect of growth  
 942 temperature on transcript and protein levels of *Drosophila* tubulin genes in S2R+ cells was  
 943 analyzed with microarrays (A), qRT-PCR (B,C) or immunoblotting (D,E). (A) Temperature  
 944 dependence of signal intensities on microarray probes. (B) Transcript levels of significantly  
 945 expressed tubulin genes at 25°C.  $\Delta$ CT values are indicated. A  $\Delta$ CT value of zero indicates a  
 946 transcript level equal to average expression of the genes used for normalization; higher  $\Delta$ CT  
 947 values indicate a relative decrease in expression. (C) Temperature dependence of transcript  
 948 levels of significantly expressed tubulin genes. For each gene, the level at 25°C was set to 1.  
 949 (D) Total extracts of S2R+ cells grown at 11, 14, 25 or 30°C were analyzed after western  
 950 blotting by Ponceau S and probing with the indicated antibodies. RL2 detects O-GlcNAc  
 951 modification on proteins which is tightly correlated with growth temperature (Radermacher



952 et al., 2014). Equal amounts of protein were loaded except for the first four lanes covering a  
953 dilution series of the 14°C extract as internal reference for quantification. (E) Signals  
954 obtained with anti-betaTubulin97EF and anti-alpha-tubulin from immunoblots as shown in  
955 (D) were quantified. Ponceau S staining intensity was used for normalization. Signal  
956 intensities observed at 25°C were set to 1. Bars indicate average (+/- s.d.; n = 3).  
957

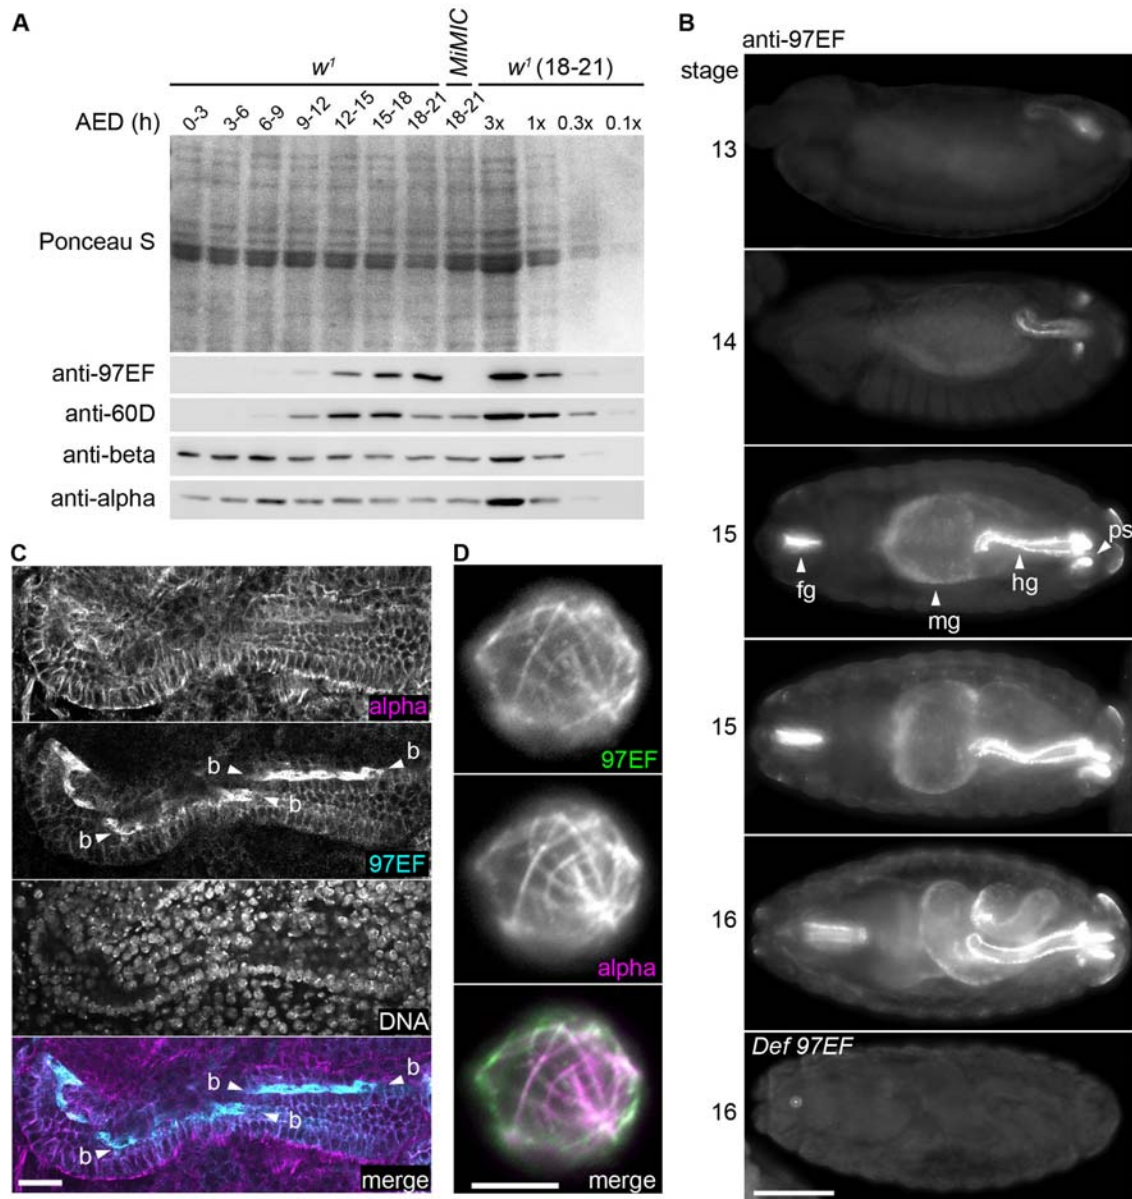

958

959

960 **Fig. 2. *betaTub97EF* expression during embryogenesis.** (A) Total extracts from *w<sup>1</sup>* embryos  
 961 at different ages AED. Equal numbers of embryos at each age interval were loaded apart  
 962 from a dilution series. An extract from *betaTub97EF* null mutants (*MiMIC*) was included.  
 963 Ponceau S staining was used as a control for equal loading. Replicate immunoblots were  
 964 probed with the indicated antibodies. (B) *w<sup>1</sup>* embryos were stained with anti-beta-Tubulin  
 965 97EF and a DNA stain (not shown). In addition, an embryo homozygous for *Df(3R)BSC460*  
 966 which deletes *betaTub97EF* is shown in the bottom panel (*Def 97EF*). Numbers on the left

967 side indicate the displayed stages. Arrowheads indicate foregut (fg), midgut (mg), hindgut  
968 (hg) and posterior spiracles (ps). (C) Hindgut region (13-15 hours AED) labeled as indicated.  
969 Boundary cells (bc) are pointed out by arrowheads. (D) Larval hemocyte after double  
970 labeling with anti-beta-Tubulin 97EF and anti-alpha-tubulin. Scale bar 50  $\mu\text{m}$  (B), 10  $\mu\text{m}$  (C)  
971 and 5  $\mu\text{m}$  (D).  
972

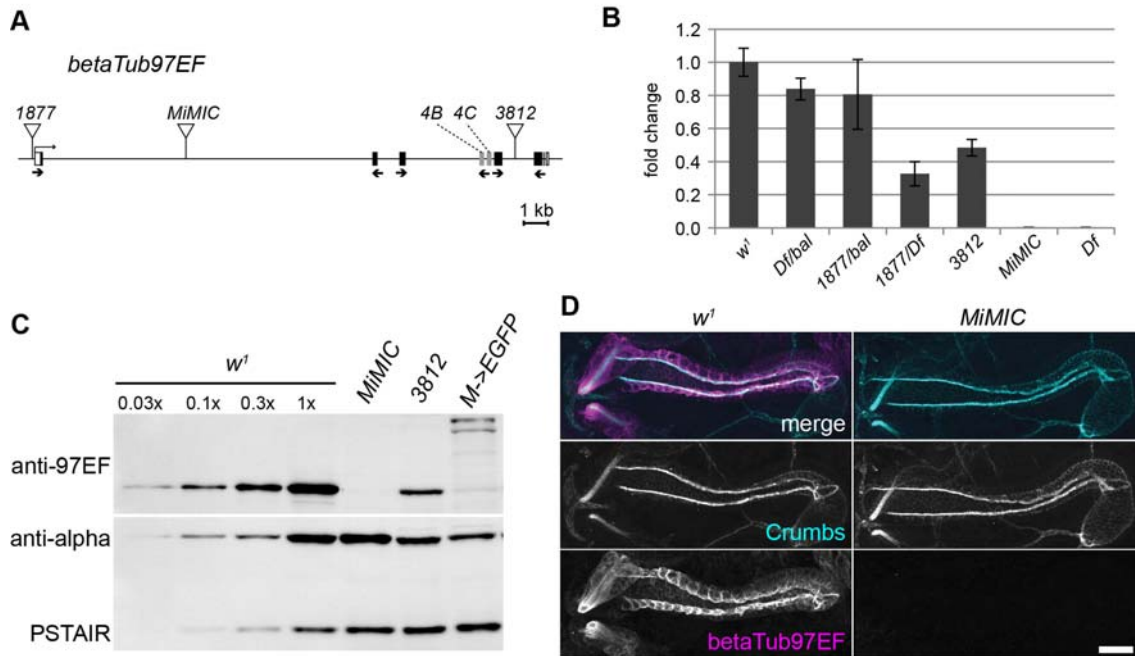

973

974

975 **Fig. 3. Characterization of mutant *betaTub97EF* alleles.** (A) Scheme of the *betaTub97EF*  
976 region. Transposon insertions (*1877*, *MiMIC* and *3812*) are indicated by triangles and exons  
977 by boxes with black filling in coding region, except for the two mutually exclusive exons 4B  
978 and 4C which are shown in grey. Small arrows below exons indicate the three primer pairs  
979 used for qRT-PCR. (B) *betaTub97EF* transcript levels were determined by qRT-PCR with  
980 embryos of the indicated genotypes (*Df* = *Df(3R)BSC460*). Results with the three primer pairs  
981 were highly concordant in a given genotype and were therefore averaged. Transcript levels  
982 are indicated by bars (average +/- s.d., n = 3 primer pairs). Those of *w<sup>1</sup>* control embryos  
983 were set to 1. (C) Total extracts from embryos (15-16 hours AED) analyzed by  
984 immunoblotting with genotypes and antibodies indicated. Anti-alpha-tubulin and anti-  
985 PSTAIR were used as a mixture to probe the replicate immunoblot shown in the lower panel.  
986 (D) Hindgut region in embryos (14-15 hours AED) after immunostaining with genotypes and  
987 antibodies as indicated. Crumbs is maximally expressed in the boundary cells of the hindgut.  
988 Scale bar 20  $\mu$ m.

989

990

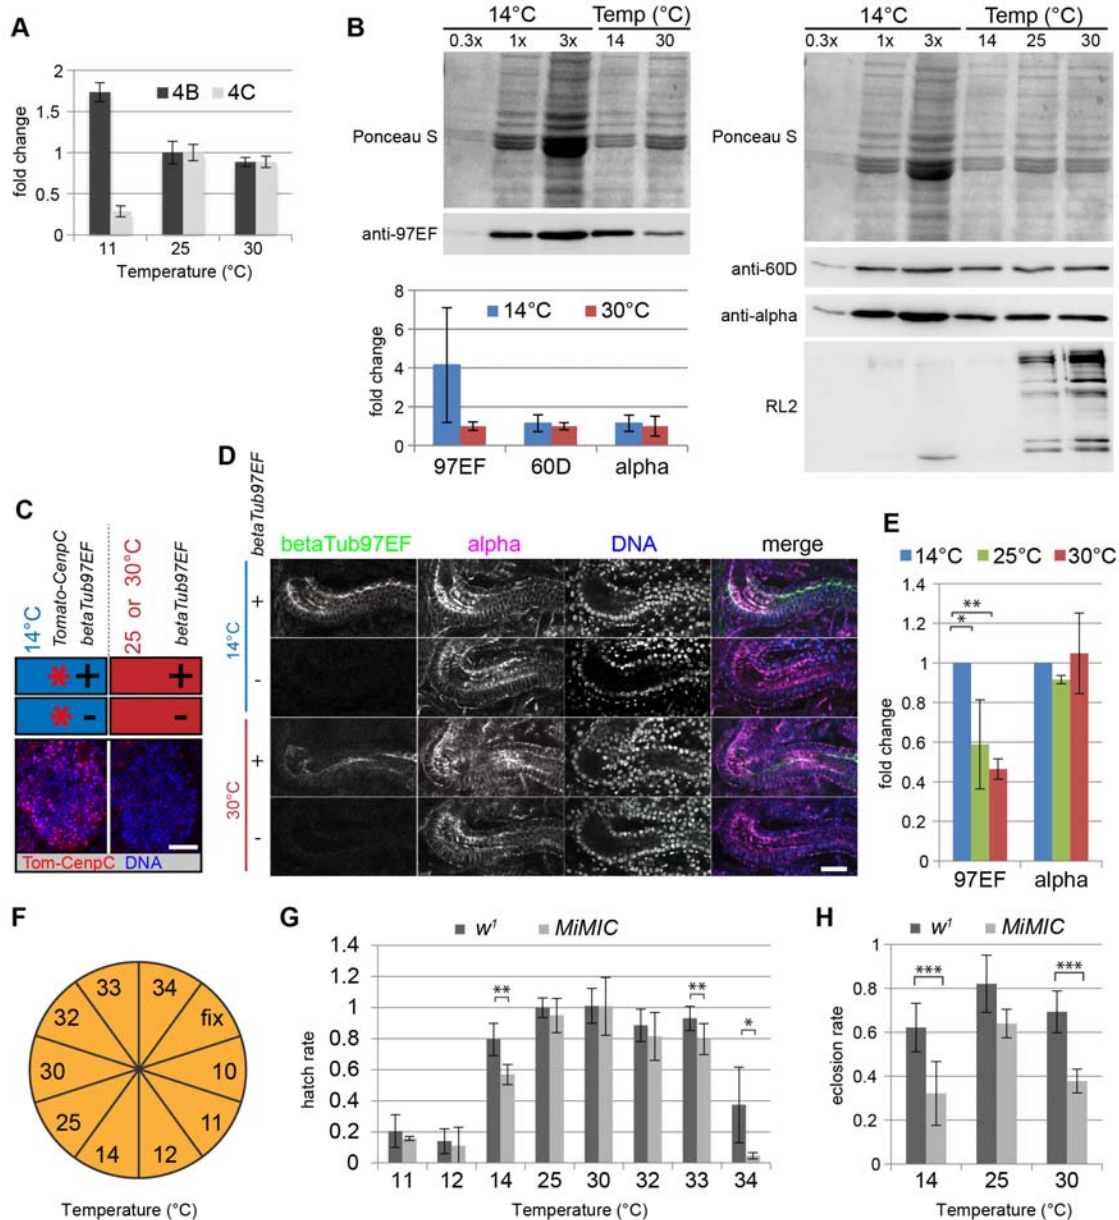

991

992

993 **Fig. 4. *betaTub97EF* upregulation at low temperature in embryos is tissue specific.** (A) qRT-  
 994 PCR revealed that the major *betaTub97EF* transcript isoform with exon 4B is upregulated at  
 995 low temperature, while the minor alternative transcript with exon 4C is downregulated.  
 996 Expression levels at 25°C were set to 1. Bars indicate average (+/- s.d.; n = 3 technical  
 997 replicates). (B) Immunoblotting revealed that beta-Tubulin 97EF protein is upregulated in  
 998 embryos at low temperature, in contrast to beta-Tubulin 60D and alpha-tubulin. Bar

999 diagram represents average immunoblot signal intensities at 14° and 30°C (+/- s.d.; n = 3  
1000 biological replicates). Ponceau S staining intensity was used for normalization. Intensities  
1001 observed at 30°C were set to 1. (C-E) Upregulation of beta-Tubulin 97EF at low temperature  
1002 is tissue-specific. (C) Experimental strategy for accurate quantification of anti-beta-Tubulin  
1003 97EF immunofluorescence signals. See text for further explanations. Scale bar 20 µm. (D)  
1004 Confocal sections through hindgut illustrate labeling with the indicated antibodies and DNA  
1005 staining in embryos of the indicated genotypes after development at 14°C and 30°C,  
1006 respectively. Scale bar 20 µm. (E) Quantification of signal intensities obtained with anti-  
1007 beta-Tubulin 97EF and anti-alpha-tubulin in the hindgut epithelium. Expression levels  
1008 observed at 14°C were set to 1. Bars indicate average (+/- s.d., n = 6 embryos). (F-H)  
1009 Temperature sensitivity of *betaTub97EF* mutant development. (F) Experimental strategy for  
1010 the analyses at different temperatures. Egg collections were divided into aliquots and  
1011 incubated at the indicated temperatures. One part (fix) was used for the determination of  
1012 the number of unfertilized and overaged embryos. (G) Rate of larval hatching at different  
1013 temperatures. (H) Rate of development to the adult stage at different temperatures. Bars  
1014 indicate average (+/- s.d., n = 3). \* p < 0.05, \*\* p < 0.01, \*\*\* p < 0.001 (t test).  
1015



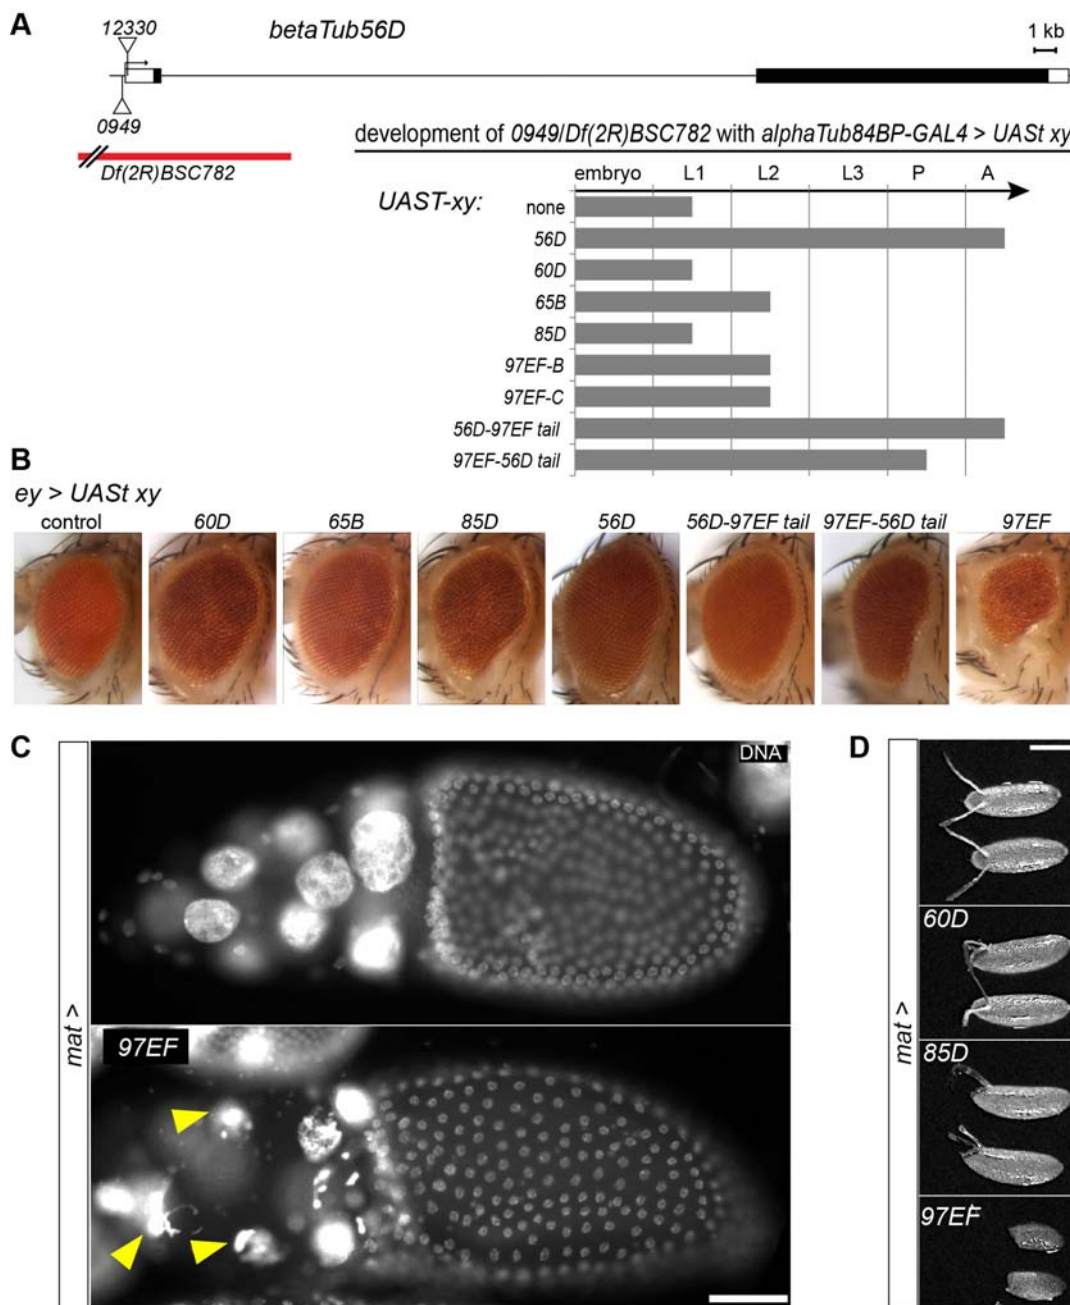

1016

1017

1018 **Fig. 5. Functional specialization of beta-Tubulin 97EF.** Functional specialization was  
1019 addressed by complementation experiments involving expression of beta-tubulin paralogs in  
1020 *betaTub56D* mutants (A) as well as after ectopic expression (B,C). (A) The P-element  
1021 insertions *NP0949* and *EY12330* within the *betaTub56D* region are indicated (triangles), as



1022 well as the intragenic breakpoint of the deficiency *Df(2R)BSC782*. Exons are represented by  
1023 boxes with black filling indicating coding region. Grey bars indicate the extent of  
1024 development of *betaTub56D<sup>NP0949</sup>/Df(2R)BSC782* mutants with *alphaTub84BP-GAL4* driven  
1025 expression of the indicated *UAS-beta-tubulin* transgenes. Larval instar stage 1-3 (L1-L3),  
1026 pupal stage (P) and adult stage (A). (B) Eye phenotype in adults after *ey-GAL4* driven  
1027 expression of the indicated *UAS-beta-tubulin* transgenes. (C,D) *mata4-GAL4VP16* was used  
1028 for expression of the indicated *UAS-beta-tubulin* transgenes during oogenesis. (C) DNA  
1029 staining in stage 10B egg chambers. Arrowheads point to some of the abnormal nurse cell  
1030 nuclei. (D) Morphology of deposited eggs. Scale bar 50  $\mu\text{m}$ .  
1031

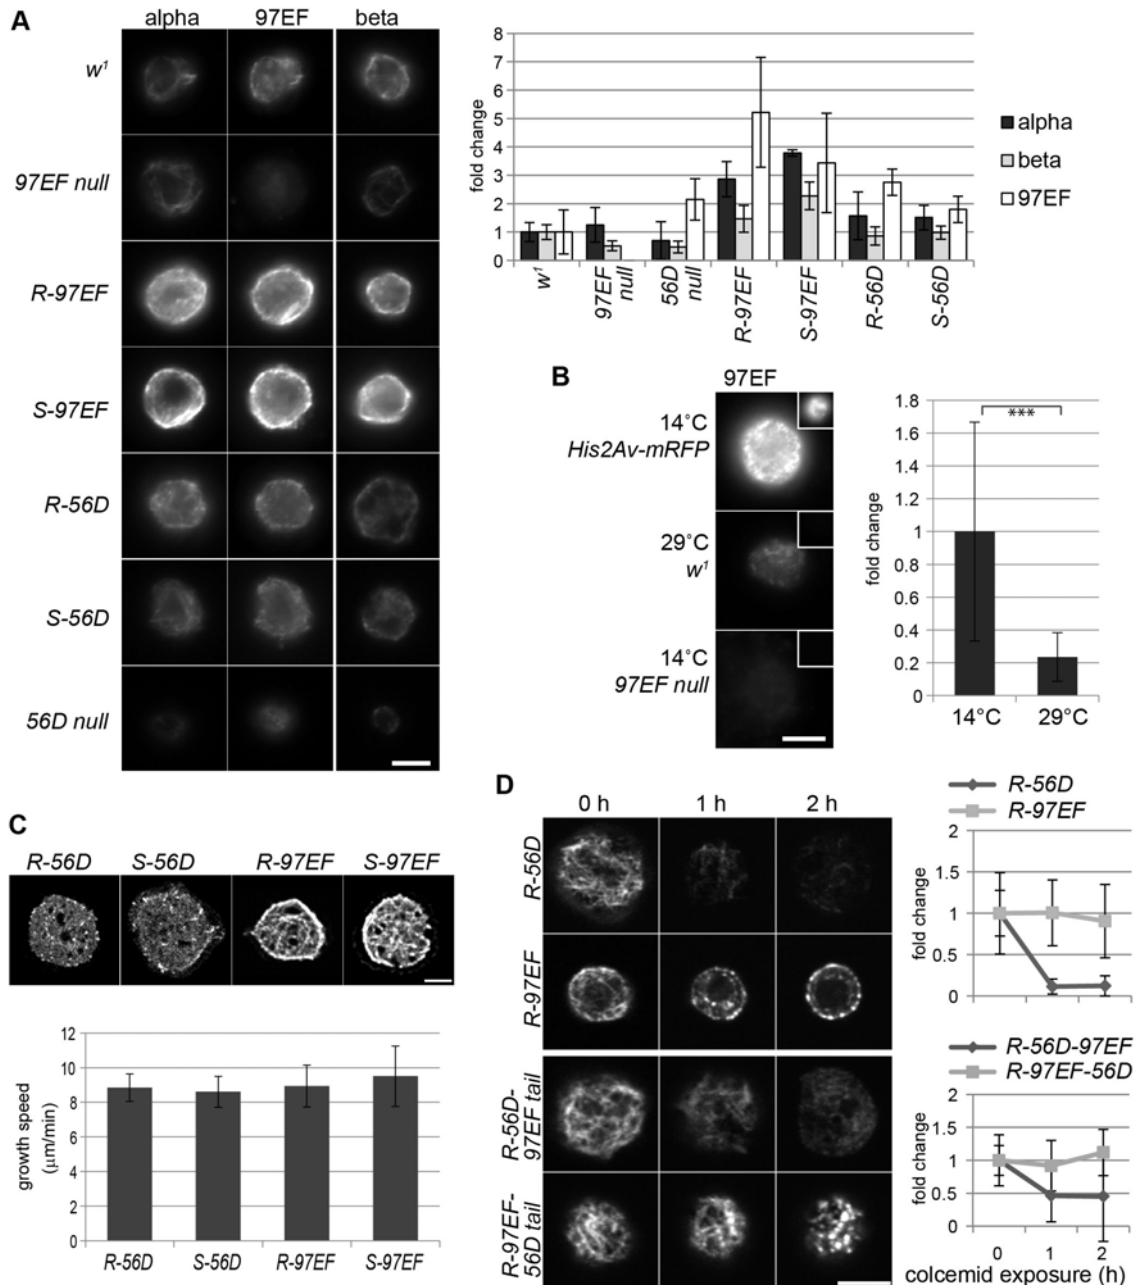

1032

1033

1034 **Fig. 6. beta-Tubulin 97EF stabilizes microtubules in larval hemocytes.** (A-D) Hemocytes  
 1035 were isolated from larvae with the indicated genotypes (*97EF null* = *betaTub97EF<sup>MiMIC</sup>*; *56D*  
 1036 *null* = *betaTub56D<sup>NP0949</sup>/Df(2R)BSC782*; *R-97EF* and *S-97EF* = *56D null* and  
 1037 *Df(2R)BSC782/balancer*, respectively, with *alphaTub84BP>betaTub97EF*; *R-56D* and *S-56D* =  
 1038 *56D null* and *Df(2R)BSC782/balancer*, respectively, with *alphaTub84BP>betaTub56D*). (A)

1039 Hemocytes were double labeled with anti-beta-Tubulin 97E and anti-alpha-tubulin (left and  
1040 middle columns) or only with anti-beta-tubulin (E7) (right column). Bar diagram represents  
1041 average signal intensity ( $\pm$  s.d.,  $n = 11$ ). Intensities obtained in  $w^1$  were set to 1. (B)  
1042 Hemocytes from larvae with the indicated genotypes after development at the indicated  
1043 temperatures were released onto the same cover slip to enforce identical fixation and  
1044 staining conditions. Nuclear His2Av-mRFP fluorescence (insets) was used for hemocyte  
1045 classification. Bar diagrams indicate average background corrected anti-beta-Tubulin 97EF  
1046 signal intensities ( $\pm$  s.d.,  $n = 20$ ). Signals observed at 14°C in  $w^1$  were set to 1. \*\*\*  $p \leq$   
1047 0.001 ( $t$  test). (C) Representative still frames after time lapse imaging of hemocytes  
1048 expressing EB1-GFP. Bar diagram indicates average speed of EB1-GFP comet movements  
1049 ( $\pm$  s.d.,  $n = 11$ ). (D) Hemocytes of indicated genotypes were treated with colcemid for the  
1050 indicated time before fixation and staining with anti-alpha-tubulin. Graph represents  
1051 average signal intensity ( $\pm$  s.d.,  $n = 6$ ). Signals observed at time 0 hours were set to 1 for  
1052 each genotype. Scale bars 5  $\mu\text{m}$ .  
1053

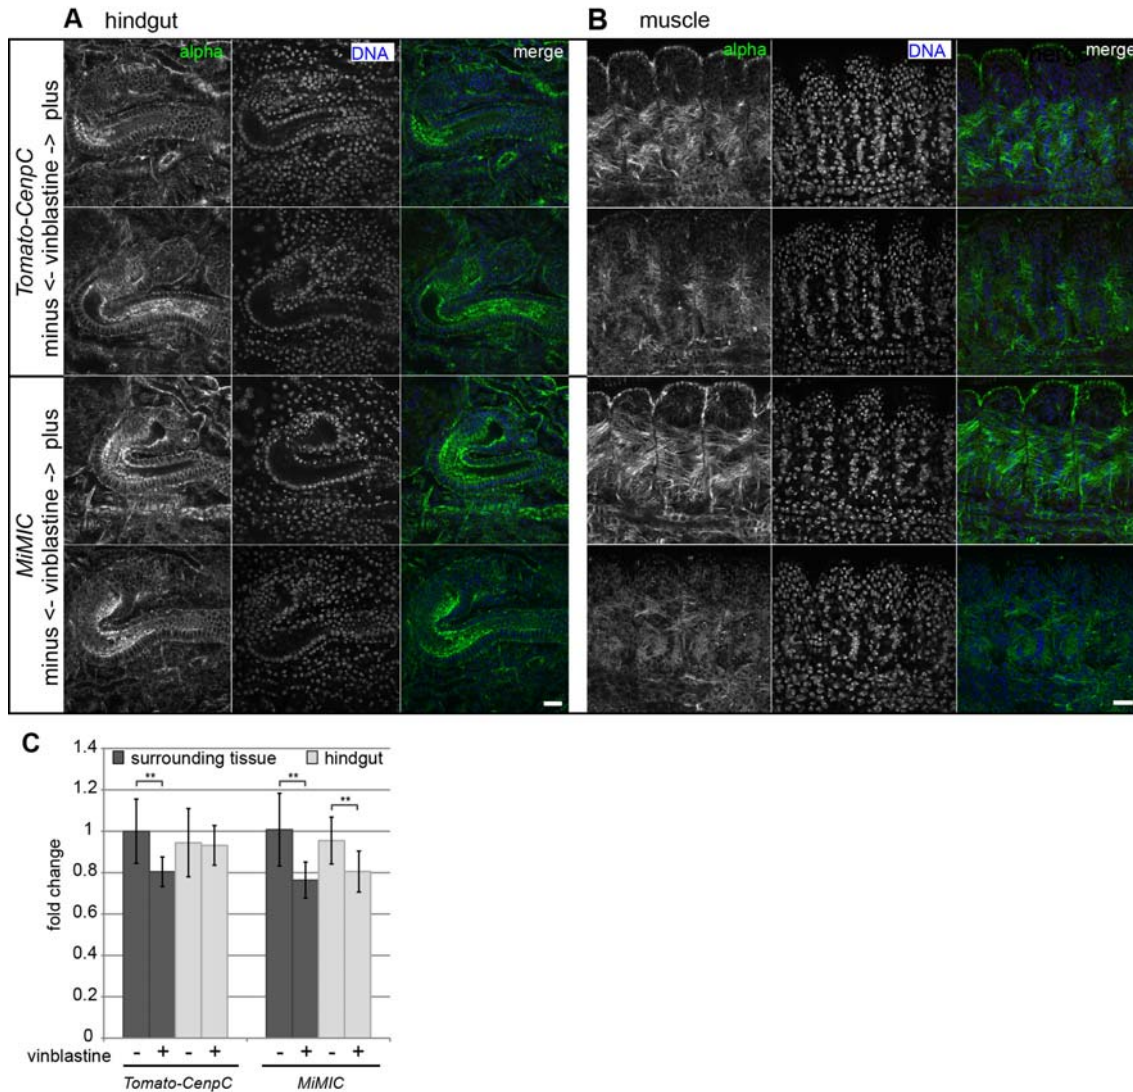

1054

1055

1056 **Fig. 7. Increased microtubule stability in the embryonic hindgut depends on *betaTub97EF*.**

1057 (A-C) Embryos (13-14 hours AED) with or without *betaTub97EF* gene function (*g-tdTomato-*

1058 *CenpC* and *MiMIC*, respectively) were exposed to vinblastine (+) or solvent only (-) before

1059 immunostaining with anti-alpha-tubulin. Sections illustrating the effect on anti-alpha-tubulin

1060 signal intensities in the hindgut and surrounding tissues (A) or in somatic muscles (B) are

1061 displayed. Scale bar 15  $\mu$ m. (C) Bar diagram representing average anti-alpha-tubulin signal

1062 intensities in the hindgut and in the surrounding tissues (+/- s.d., n = 9). \*\* p < 0.01 (t test).

1063 Signals in controls were set to 1.

## Supplementary information

### **Drosophila beta-Tubulin 97EF is upregulated at low temperature and stabilizes microtubules**

Faina Myachina<sup>1)</sup>, Fritz Bosshardt<sup>1)</sup>, Johannes Bischof<sup>1)</sup>, Moritz Kirschmann<sup>2)</sup>,  
Christian F. Lehner<sup>1,3)</sup>

1) Institute of Molecular Life Sciences (IMLS), University of Zurich, 8057 Zurich, Switzerland

2) Center for Microscopy and Image Analysis, University of Zurich, 8057 Zurich, Switzerland

3) Author for correspondence ([christian.lehner@imls.uzh.ch](mailto:christian.lehner@imls.uzh.ch))

Supplementary information includes:

- Supplementary Figs S1-5
- Supplementary Movies S1
- Supplementary Materials and Methods
- Supplementary Table S1
- Supplementary References



```

Tub56D      MREIVHIQAGQCQGNQIGAKFWEIISDEHGIDA-TGAYHGSDLQLERINVYYNEA----- 54
Tub60D      MREIVNLQAGQCQGNQIGAKFWEIISEEHGIDS-NGIYVGDSDLQLERVSVYYNEASAVTR 59
Tub65B      MREIVTLQIGGAGNAIGDSFHWVISHHEHGVYASGRFRGGTSPLQLERINVFFNAT----- 55
Tub85D      MREIVHIQAGQCQGNQIGGKFWEIVSDEHCIDA-TGTYYGSDLQLERINVYYNEA----- 54
Tub97EF-4B MREIVHLQAGQCQGNQIGSKFWEIISDEHGIDP-NGYYHGESALQHERIDVYYNEA----- 54
Tub97EF-4C MREIVHLQAGQCQGNQIGSKFWEIISDEHGIDP-NGYYHGESALQHERIDVYYNEA----- 54
***** : * * * * * : * * * * * : * * * * * : * * * * * : * * * * * : * * * * * :

Tub56D      -SGGKYVPRAVLVLEPMTDSVRSRSGPFQIFRPDNFVFGQSGAGNNWAKGHYTEGAELV 113
Tub60D      SSGGKYVPRAILLDLEPMTDSVRSRSGPYGQIFRPDNFVYGGQSGAGNNWAKGHYTEGAELV 119
Tub65B      -ASKRFYARTILIDTEASTIQRL--NASSQLYRPFENFVAGSEAGNNFARGYHTDGAAIL 112
Tub85D      -TGAKYVPRAILVLEPMTDSVRSRSGAFGQIFRPDNFVFGQSGAGNNWAKGHYTEGAELV 113
Tub97EF-4B -SSGKYVPRAVLIDLEPMTDSVRQSPVQGLFRPDNFVYGGQSGAGNNWAKGHYTEGAELI 113
Tub97EF-4C -SSGKYVPRAVLIDLEPMTDSVRQSPVQGLFRPDNFVYGGQSGAGNNWAKGHYTEGAELI 113
: . : : * : * * * * * : * : : : . : * : * : * : * * * * * : * : * : * : * :

Tub56D      DSVLDVVRKEAESDCDCLQGFLTHSLGGGTGSGMGTLLISKIREEYPDRIMNTYSVVPSP 173
Tub60D      DNVLDDVVRKECENCDCDCLQGFLTHSLGGGTGSGMGTLLISKIREEYPDRIMNTYSVVPSP 179
Tub65B      DQVLENTREVESVDSLQGFQLLHSLGGGTGSGLTSLIMEALVEQYPDNLLCNVVTIPSP 172
Tub85D      DSVLDVVRKESEGCDCDCLQGFLTHSLGGGTGSGMGTLLISKIREEYPDRIMNTYSVVPSP 173
Tub97EF-4B DSVLEVLKRESEGCDCDCLQGFLAHSLSGGGTGSGLGTLLISKIREEYPDRIMNTYSVVPSP 173
Tub97EF-4C DSVLEVLKRESEGCDCDCLQGFLAHSLSGGGTGSGLGTLLISKIREEYPDRIMNTYSVVPSP 173
* . * : * : * * * * * : * : * : * : * : * : * : * : * : * : * : * : * :

Tub56D      KVS DTVPEPNATLSVHQLVENTDETYCIDNEALYDICFRTLKLTPTYGDLNHLVSLTM 233
Tub60D      KVS DTVPEPNATLSIHQLVENTDETYCIDNEALYDICFRTLKLVNPSYGDLNHLVSLTM 239
Tub65B      NMSQVVPEPNALLSTPALVNNSHLTFCLDNEALFQICNRNLKLMKSGYEHINHIVALTM 232
Tub85D      KVS DTVPEPNATLSVHQLVENTDETYCIDNEALYDICFRTLKLTPTYGDLNHLVSATM 233
Tub97EF-4B KVS DTVPEPNATLSIHQLVENTDETFCIDNEALYDICFRTLKLSPTYGDLNHLVSTM 233
Tub97EF-4C KVS ETVPEPNATLSLHQLIVDTETFCIDNEALYDICYQSLRISPTYGDLNHLVSTM 233
: : * : * : * : * * * * * : * : : : * : * : * : * : * : * : * : * : * :

Tub56D      SGVTTCLRFPGQLNADLRKLVANMVFPPRLHFFMPGFAPLTSRGSQQYRALTVPELTQQM 293
Tub60D      SGVTTCLRFPGQLNADLRKLVANMVFPPRLHFFMPGFAPLTSRGSQQYRALTVPELTQQM 299
Tub65B      SGIITCLRFPGQLNAGLRKIYNMVFPPRLHFLIPGFAPLVTCKQQQFSKGTVSELVQQI 292
Tub85D      SGVTTCLRFPGQLNADLRKLVANMVFPPRLHFFMPGFAPLTSRGSQQYRALTVPELTQQM 293
Tub97EF-4B SGVTTCLRFPGQLNADLRKLVANMVFPPRLHFFMPGFAPLTAKGSQQYRALTVPELTQQM 293
Tub97EF-4C SGVTTCLRFPGQLNADLRKLVANMVFPPRLHFFMPGFAPLTAKGSQQYRALTVPELTQQM 293
* : * : * : * : * : * * * : * : * : * : * : * : * : * : * : * : * : * :

Tub56D      FDAKNMAACDPRHGRYLTVAAIFRGRMSMKEVDEQMLNIQKNSSYFVEWIPNNVKTAV 353
Tub60D      FDAKNMAACDPRHGRYLTVAAVFRGRMSMKEVDEQMLAVQKNSSYFVEWIPNNVKTAV 359
Tub65B      FYSNNLLCAIDLKRLKLLTAAGIFRGRMSPREVDQLMTGVRNKNINNFVDWIPNNIKTAI 352
Tub85D      FDAKNMAACDPRHGRYLTVAAIFRGRMSMKEVDEQMLNIQKNSSYFVEWIPNNCKTAV 353
Tub97EF-4B FDAKNMNTACDPRHGRYLTVACIFRGPMSMKEVDTQMYNVQSKNSSYFVEWIPNNVKVAV 353
Tub97EF-4C FDAKNMNTACDPRHGRYLTVACIFRGPMSMKEVDTQMYNVQSKNSSYFVEWIPNNVKVAV 353
* : : : * : * : * : * : * : * * * : * : * : * : * : * : * : * : * : * :

Tub56D      CDIPPRGLKMSATFIGNSTAIQELFKRISEQFTAMFRKAFHLHWYTGEGMDEMEFTEAES 413
Tub60D      CDIPPRGLKMSSTFIGNTTAIQELFKRISEQFSAMFRKAFHLHWYTGEGMDEMEFTEAES 419
Tub65B      CDIPPRGLKMSATFIGNTTAIQLFQRLLDASMSMLRRKKAHLHWYTGEGMEEQEFQDAQQ 412
Tub85D      CDIPPRGLKMSATFIGNSTAIQELFKRVSEQFTAMFRKAFHLHWYTGEGMDEMEFTEAES 413
Tub97EF-4B CDIPPRGLKMSATFIGNSTAIQEIFKRISEQFTAMFRKAFHLHWYTGEGMDEMEFTEAES 413
Tub97EF-4C CDIPPRGLKMSATFIGNSTAIQEIFKRISEQFTAMFRKAFHLHWYTGEGMDEMEFTEAES 413
***** : * : * : * : * : * : * : * : * : * : * : * : * : * : * : * :

Tub56D      NMNDLVSEYQQYQEATADEDAEFEEEQEAQAEVDEN----- 447
Tub60D      NMNDLVSEYQQYQEATADEDFEVDNQEVEEGDCI----- 454
Tub65B      ELQAIIDDYRSSAEGEDSGGG-----GGGGGRSGSAESGEEATPEAHCQYCTE 462
Tub85D      NMNDLVSEYQQYQEATADEEVEFDEDEEGGGDE----- 446
Tub97EF-4B NMNDLISEYQQYQEATADEVEFDDQAEQEGYESEVLQNGNGE----- 457
Tub97EF-4C NMNDLISEYQQYQEATADEVEFDDQAEQEGYESEVLQNGNGE----- 457
: : : : * : * : * : * : * : * : * : * : * : * : * : * : * : * : * :

```

**Fig. S1. Comparison of amino acid sequences of *Drosophila* beta-tubulin paralogs.** Highlighted in yellow is the sequence of the peptide used for the production of a beta-Tubulin 97EF-specific antibody. The region encoded by the mutually exclusive exons 4B and 4C of beta-Tubulin 97EF are indicated by grey shading. The N- and C-terminal sequences (green shading) are less conserved than the core domains. These terminal sequences were present in the GST fusions which were expressed in bacteria for the characterization of various antibodies (see Fig. S2).



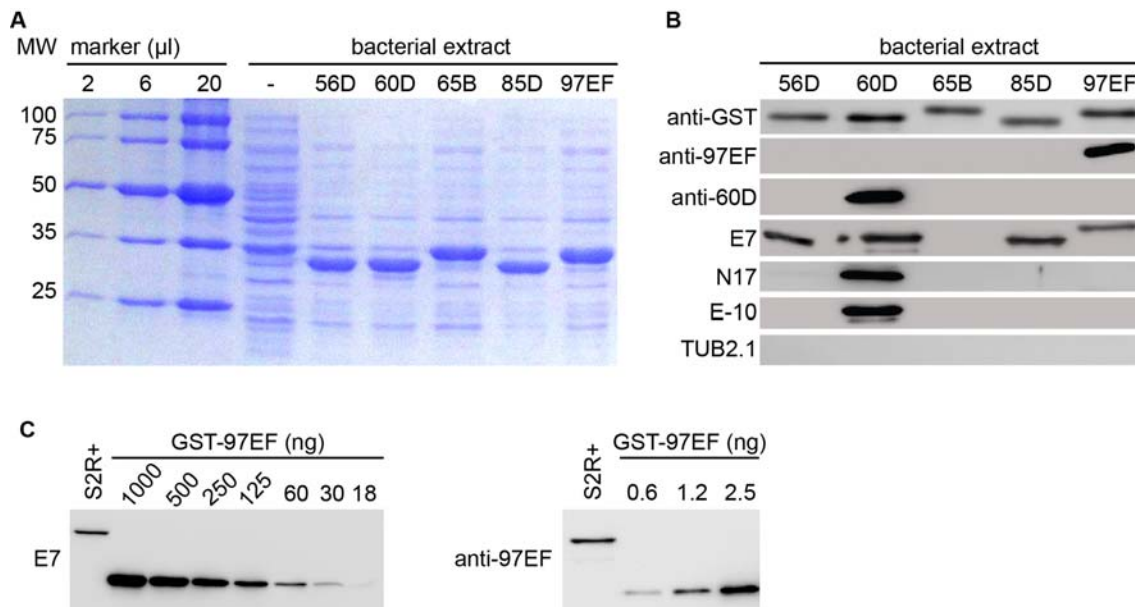

**Fig. S2. Characterization of various anti-beta-tubulin antibodies.** (A) Bacterial extracts containing GST fusion proteins with distinct N- and C-terminal extensions corresponding to the N and C-terminal tails of the indicated *Drosophila* beta-tubulin paralogs were resolved by SDS-PAGE and analyzed by Coomassie Blue staining. In addition, a control extract (-) from bacteria without an expression construct, as well as a dilution series with known amounts of molecular weight marker proteins was analyzed. (B) Extracts with GST beta-tubulin tail fusions (as in A) were analyzed by immunoblotting with the indicated antibodies. 100 ng of GST fusion protein per lane was loaded in case of the immunoblots with anti-GST, E7, E-10, and dN-17, while 5 ng was loaded for the analyses with anti-97EF and anti-60D. (C) Total extracts of S2R+ cells grown at 25°C were analyzed by immunoblotting with anti-beta-Tubulin 97EF and anti-beta-Tubulin E7. 20  $\mu$ g of total cellular protein was loaded in case of the anti-97EF immunoblot and 10  $\mu$ g in case of the E7 immunoblot. For determination of the amount of beta-Tubulin 97EF and of total beta-tubulin in S2R+ cells a dilution series of the bacterial extract containing a known amount of the GST fusion protein with beta-tubulin 97EF tails was resolved and analyzed on the same immunoblots.

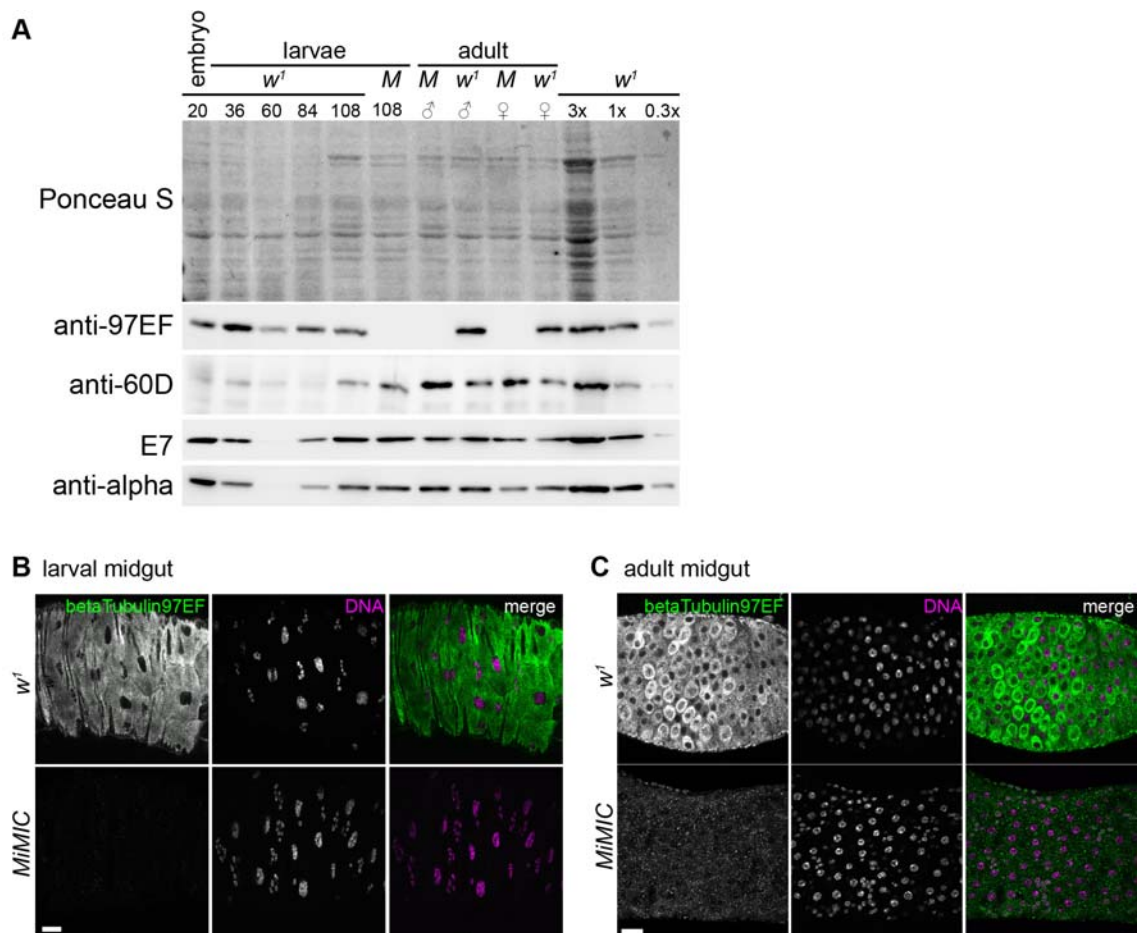

**Fig. S3. *betaTub97EF* expression in larval and adult tissues.** (A) Total extracts prepared from either late embryos (embryo), larvae or adults were resolved by SDS-PAGE and analyzed after Western blotting by Ponceau S staining and probing with the indicated antibodies. Samples were from either the *w<sup>1</sup>* control strain or *betaTub97EF<sup>MiMIC</sup>* null mutants (M for *MiMIC*). Embryonic and larval extracts were prepared from samples aged for the indicated time (hours after AED). 36, 60, 84 and 108 hours AED correspond to mid-first, mid-second, early and late third instar, respectively. In case of adults, flies (0-1 day after eclosion) were separated according to sex before extract preparation. Equal amounts of protein were loaded in all lanes except for the last three where a dilution series of the *w<sup>1</sup>* larval extract (108 hours AED) was loaded as internal reference for quantification. (B,C) Immunostaining of the gut from *w<sup>1</sup>* and *betaTub97EF<sup>MiMIC</sup>* animals during third larval instar wandering stage (B) or from adults (C) with anti-beta-Tubulin 97EF and a DNA stain. Scale bar 20  $\mu$ m.

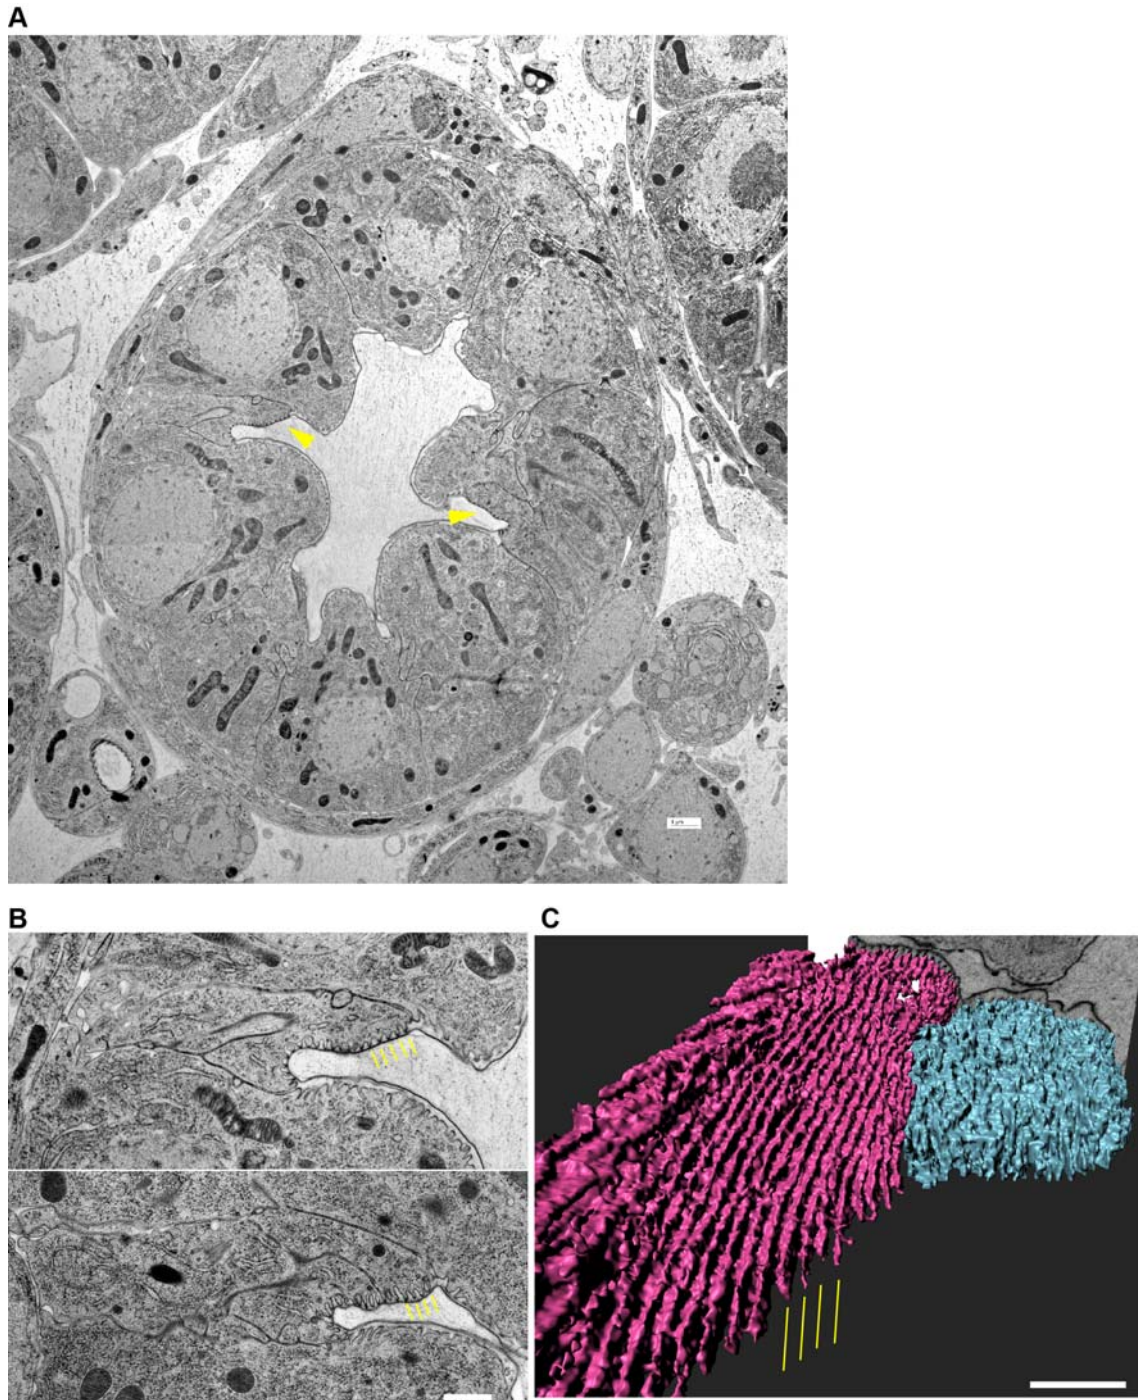

**Fig. S4. Boundary cells in the embryonic hindgut form longitudinally extended undulae.** (A) Embryos at stage 16 were fixed by high-pressure freezing and processed for TEM and FIBSEM analysis. The cross section through a control hindgut reveals the characteristic apical structures in boundary cells (yellow arrowheads). Scale bar 1  $\mu\text{m}$ . (B) The boundary cells in both control (top) and *betaTub97EF<sup>MIMIC</sup>* mutants (bottom) differentiate the characteristic apical structures (yellow dashes). Scale bar 1  $\mu\text{m}$ . (C) 3D-reconstruction of the apical surface of a boundary cell (purple) and a neighboring principal cell (cyan) after FIBSEM reveals that the characteristic apical structures of boundary cells represent highly organized longitudinal undulae, which are absent from principal cells (cyan). Scale bar 0.5  $\mu\text{m}$ .



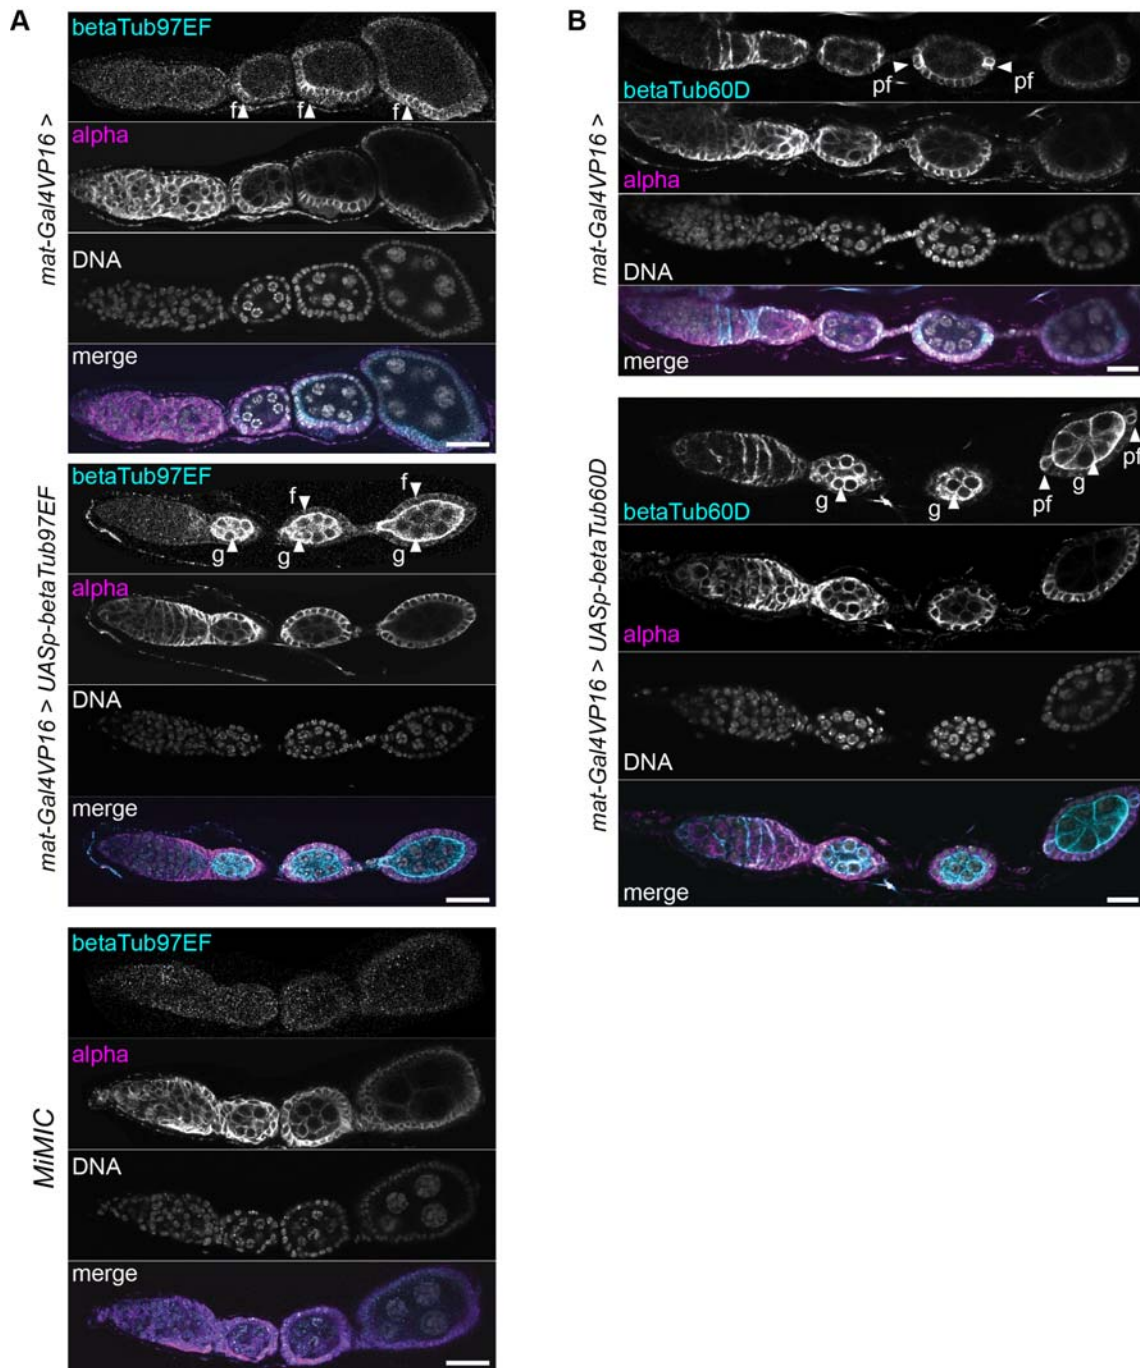

**Fig. S5. Ectopic *betaTub97EF* and *betaTub60D* expression in the female germline during oogenesis.** Ovaries were isolated from females with the indicated genotypes (*MiMIC* = *betaTub97EF<sup>MiMIC</sup>*). After fixation, DNA staining and immunolabeling with indicated antibodies were performed. The early stages of oogenesis in representative ovarioles are shown. *mat-GAL4VP16* drives expression of *UASp* transgenes in the germline, starting during stage 2 of oogenesis. Arrowheads indicate expression in follicle cells (f), germline cells (g) and polar follicle cells (pf). Scale bars 20  $\mu\text{m}$ .

**Movie S1. EB1-GFP comets in hemocytes expressing different beta-Tubulin isoforms.**

Larval hemocytes (designated as *R-56D*, *S-56D*, *R-97EF*, and *S-97EF* as in the main text) were isolated from *betaTub56D<sup>NP0949</sup>/Df(2R)BSC782* (*R*) or balancer/*Df(2R)BSC782* (*S*) larvae with *alphaTub84BP-GAL4* driven expression of *UASp-EB1-GFP* and either *UAS-betaTub56D* or *UAS-betaTub97EF*. Sum intensity projections of three optical sections acquired at 1 second intervals are shown.

## Supplementary Materials and Methods

### Plasmids

Constructs for bacterial expression of GST fusion proteins with N- and C-terminal extensions corresponding to the terminal sequences of the different *Drosophila* beta-tubulin paralogs were made using the pET-21d vector (Novagen). Gene blocks (Integrated DNA Technologies) coding for the N- and C-terminal regions as indicated in Fig. S1 were inserted. The sequences of these gene blocks are given in Table S1. The gene blocks carried an NcoI and a NotI site at the 5' and 3' end, respectively. These sites were used for cloning into the corresponding sites of pET-21d. Moreover, a linker sequence with a HindIII and BamHI site was present in the gene blocks in between the N- and C-terminal coding sequences. These sites were used for the insertion of the GST coding region that was amplified with CL204 and CL205 from the pGEX-2T vector (Smith and Johnson, 1988).

Additional *Drosophila* ORFeome constructs were made with the previously described cloning strategy (Bischof et al., 2013). The coding regions of *Drosophila* beta-tubulin paralogs were amplified from the following cDNA plasmids (Drosophila Genome Resource Center, Indiana University, Indiana, USA) with the indicated primer pairs (see Table S1 for sequences): *betaTub56D* from pOT2\_LD43681 (Rubin et al., 2000) with FM200/FM201, *betaTub60D* from pFLC1\_RE53159 (Stapleton et al., 2002) with FM116/FM117, *betaTub65B* from pOTB7\_AT27896 (Stapleton et al., 2002) with FM122/FM123, *betaTub97EF-4C* from pOT2\_Tub97EF\_4C with FM113/FM114. pOT2\_Tub97EF\_4C was made using pOT2-LP10436 (Rubin, 2000 #7431), which contains a *betaTub97EF-4B* cDNA, by exchanging a BamHI and Ehel fragment including the exon 4B with a gene block (Integrated DNA Technologies) containing exon 4C instead of 4B (see Table S1 for sequence).

For GAL4-regulated expression in the female germline, we generated transgene constructs using the vector pUASp-K10attB kindly provided by B. Suter (University of Berne, Switzerland). The coding regions of beta-tubulin paralogs were inserted into the SfiI and XbaI sites of this vector after enzymatic amplification from the following cDNA plasmids with the indicated primer pairs (see Table S1 for sequences): *betaTub60D* from pFLC-1-RE53159 with FM212/FM213; *betaTub85D* from pOT2-



GH62051 with FM214/FM215, *betaTub97EF-4B* from pOT2-LP10436 with FM208/FM209.

### Generation of transgenic *Drosophila* strains

The additional *Drosophila* ORFeome constructs, as well as the pUASp-K10attB constructs described above were injected into  $y^1 M\{vas-int.Dm\}ZH-2A w^*$ ;  $M\{3xP3-RFP.attP\}ZH-86Fb$  (Bischof et al., 2007). F1 progeny was crossed to *yw* and progeny was screened for  $w^+$  flies, followed by establishment of transgenic lines.

The reporter line *betaTub97EF<sup>EGFP</sup>* was generated by recombinase mediated cassette exchange using *betaTub97EF<sup>MiMIC[Mi06334]</sup>* (Venken et al., 2011). The cassette present in  $Mi\{MIC\}[Mi06334]$  was replaced with the EGFP cassette in the donor plasmid pBS-KS-attB1-2-PT-SA-SD-0-EGFP-FIAsHStrepII-TEV-3xFlag (*Drosophila* Genome Resource Center, Indiana University, Indiana, USA). For exchange, the donor plasmid was injected at a concentration of 50 ng/ $\mu$ l into eggs collected from a cross of  $y^1 M\{vas-int.Dm\}ZH-2A w^*$ ;  $M\{3xP3-RFP.attP\}ZH-86Fb$  virgin females with *betaTub97EF<sup>MiMIC[Mi06334]</sup>* males. Exchange events and associated cassette orientation were identified and characterized as described (Venken et al., 2011).

### Antibodies

For immunoblotting (IB) and immunofluorescence (IF) we used the following antibodies at the indicated dilutions: affinity purified rabbit anti-beta-Tubulin 97EF, 1:3000 (IF) and 1:8000 (IB); rabbit anti-beta-Tubulin 60D, 1:10000 (IF) and 1:5000 (IB); mouse monoclonal antibody DM1A against alpha-tubulin (Sigma, F2168) 1:10000 (IF) and 1:50000 (IB); mouse monoclonal anti-beta-tubulin TUB2.1 (Sigma, T4026) 1:500 (IB); mouse monoclonal antibody E-10 against beta-tubulin (Santa Cruz, sc-365791) 1:100 (IF) and 1:500 (IB); goat polyclonal antibody dN-17 against beta-tubulin (Santa Cruz, sc-20852), 1:500 (IB); mouse monoclonal antibody E7 against beta-tubulin 1:10 (IF) and 1:100 (IB); mouse monoclonal antibody Cq4 against Crumbs, 1:100 (IF); goat polyclonal antibody against GST (GE Healthcare Life Sciences, 27-4577-01), 1:1000 (IB); mouse monoclonal antibody anti-PSTAIR (Sigma Aldrich, P7962) 1:1000 (IB); mouse monoclonal antibody RL2 (Abcam, ab2739) 1:2000 (IB). Hybridoma supernatant containing E7 or Cq4 was obtained from Developmental Studies Hybridoma Bank (DSHB) created by the NICHD of the

NIH and maintained at The University of Iowa, Department of Biology, Iowa City, IA 52242). Secondary antibodies for immunofluorescence were used at 1:500: Alexa 488-conjugated goat anti-rabbit IgG (Invitrogen, A-11008) and anti-mouse IgG (Invitrogen, A11029), Alexa 568-conjugated goat anti-rabbit IgG (Invitrogen, A-11011) and anti-mouse IgG (Invitrogen, A-11004), or Cy5-conjugated goat anti-mouse IgG (Jackson ImmunoResearch, 115-175-146). Secondary antibodies used for immunoblotting (Jackson ImmunoResearch) were used at 1:1000: peroxidase-coupled goat anti-mouse and anti-rabbit, as well as well as donkey anti-goat.

### qRT-PCR

Total RNA was extracted from S2R<sup>+</sup> cells (about  $7 \times 10^6$  cells) or embryos (100-300) using TRIzol (Invitrogen), followed by DNase digestion (DNA-Free Kit, Ambion). cDNA synthesis was performed using Transcriptor High-Fidelity cDNA Synthesis Kit (Roche) with 500ng RNA per reaction. Quantitative real-time PCR was performed using SYBR Green with an Applied Biosystems 7900HT using the recommended two-step cycling protocol. The following primer pairs (for sequences see Table S1) were used for the qRT-PCR analyses. For controls: *Act5C*: Act5C-F/Act5C-R, *Tbp*: Tbp-F/Tbp-R, *alphaTub84B*: alphaTub84B-F/alphaTub84B-R. For samples: *alphaTub84B*: FM158/159, *alphaTub84D*: FM160/161, *gammaTub23C*: FM176/FM177, *betaTub56D*: FM164/FM165, *betaTub60D*: FM170/FM171, *betaTub97EF*: FM106/FM107, FM79/80, FM63/FM66, FM39/FM40, FM64/FM65. Results obtained with the *betaTub97EF* primer pairs were averaged for Fig. 1. The *betaTub97EF* primer pairs used for Fig. 3 were FM63/FM66, FM73/FM74 and FM79/80. For distinction of the two *betaTub97EF* transcript isoforms resulting from mutually exclusive splicing of exon 4, the primer pairs FM63/FM66 (exon 4B) and FM63/FM111 (exon 4C) were used. For calculation of the  $\Delta$ CT values (Fig. 1B), the CT values obtained for a given tubulin paralog was subtracted from an average CT value corresponding to the mean CT of the three control genes (*Act5C*, *alphaTub84B*, *Tbp*). We point out that our conclusions concerning relative abundance and temperature induced changes of the transcript levels of the tubulin paralogs based on qRT-PCR were not affected when only *Act5C* and *Tbp* but not *alphaTub84B* were used as control genes.

## Immunoblotting

Total extracts from bacteria expressing GST fusion proteins with N- and C-terminal extensions corresponding to those of the *Drosophila* beta-tubulin paralogs were made after transformation of *E. coli* BL21(DE3)[pREP4] with the pET-21d constructs described above. Expression was induced in transformants by addition of 1 mM IPTG during 2 hours. Cells were collected by centrifugation and lysed with 3x Laemmli buffer. The amount of GST fusion protein in the extracts was estimated after SDS-PAGE and Coomassie Blue staining gel using the staining intensity obtained with a known amount of molecular marker proteins resolved in parallel (PageRuler, Unstained Protein Ladder, Thermo Fisher Scientific, catalog number 26614).

For analysis of the expression of *Drosophila* beta-tubulin paralogs during embryogenesis, *w*<sup>1</sup> and *betaTub97EF*<sup>MiMIC</sup> embryos were collected for 3 hours and aged as indicated (Fig. 2A). Total extracts were prepared as described below. Ten embryos were loaded per lane. Two biological replicas gave similar results.

To compare the levels of beta-Tubulin 97EF protein in different genotypes, embryos were collected at 25°C from *w*<sup>1</sup>, *betaTub97EF*<sup>MiMIC</sup> and *betaTub97EF*<sup>EGFP</sup> and aged to 15-16 hours AED embryos. Total extracts were prepared as described below. 20 embryos were loaded per lane.

For analysis of the expression of *Drosophila* beta-tubulin paralogs during the larval stages, eggs were first collected at 25°C during one hour. The apple agar collection plate with the eggs was divided into five parts. These were aged at 25°C to either the late embryonic stage (20 hours AED), to the middle of first larval instar stage (36 hours AED), to the middle of the second (60 hours AED), and to the beginning or the end of the third larval instar stage (84 and 108 hours AED, respectively). Embryos at the late embryonic stage as well as the first instar larvae were collected directly from the plate into 0.7% NaCl, 0.07% Triton X-100 in an Eppendorf tube. Embryos were further processed as described (Radermacher et al., 2014). To obtain the other samples, the pieces of collection plate with eggs were placed into a bottle with standard fly food and aged for the desired time at 25°C. The upper layer of fly food with the larvae was then transferred into to a glass beaker, except for the late third instar samples. After addition of some water and a lid, the beaker was shaken to release the larvae from the food. After transfer of the beaker content into a glass dish, about 40 larvae were picked individually into an Eppendorf tube for sample

preparation. Around 20 late third instar larvae were directly picked as wandering stage larvae from the walls of the bottles. Extracts were prepared as described below. 10  $\mu$ g of total protein was loaded per lane. Three biological replicas were performed.

To prepare samples from adults, 10 males and females (0-1 day after eclosion), respectively, were collected in an Eppendorf tube followed by extract preparation as described below. 10  $\mu$ g of total protein was loaded per lane.

Total extracts of *Drosophila* cells, embryos, larvae and adults were prepared in 3x Laemmli buffer. For extracts from larvae and adults, several inhibitors were added to the 3x Laemmli buffer: 1:20 Protease Inhibitor Cocktail, 1:100 PEFA Block 200 mM, Benzamidin 4 mM, Sigma). In general, samples were homogenized in 50  $\mu$ l and combined with additional 50  $\mu$ l used for washing homogenization pestle and tubes. Thereafter samples were heated for 5 minutes at 95°C, centrifuged for 5 minutes at maximum speed at 4°C in an Eppendorf centrifuge, aliquoted and snap frozen in liquid nitrogen. Total protein concentration in the extracts was determined using the Pierce 660nm Protein Assay (Thermo Scientific).

### **Immunofluorescence**

For high magnification analysis of the hindgut, *w*<sup>1</sup> embryos (13-15 hours AED) were analyzed with an Olympus FluoView1000 confocal laser scanning microscope and a 60x/1.35 objective. For higher view of subcellular structures, a 2x zoom was used.

Third instar larvae and adult animals were dissected in phosphate buffered saline (PBS) and organs were directly transferred into 4% paraformaldehyd (PFA) in PBS for fixation. Samples were fixed for 30 min at room temperature (RT), followed by three 20 min washes with PBs containing 0.1% Triton X-100 (PBTx). Blocking was performed for 1 hour at RT in PBTx with 10% fetal bovine serum (FBS). Primary antibodies were added in blocking solution and incubated overnight at 4°C. After three 20 min washes with PBTx, the secondary antibodies were added in PBTx containing 10% FBS for 2 hours at RT. After three 20 min washes with PBTx, the tissues were incubated for 4 min at RT with Hoechst 33285 (1  $\mu$ g/ml in PBTx). After three washes with PBS, tissues were mounted on slides in mounting media. For staining of ovaries, these were dissected from 3 day-old females. The ovarioles were gently separated apart partially with a dissection needle. Fixing, staining and imaging were performed as described above.

## Electron microscopy

Eggs were collected from *w<sup>1</sup>* and *betaTub97EF<sup>MiMIC</sup>* and aged at 25°C to 15-16 hours AED. Eggs were dechorionated. Unfertilized eggs were discarded. Embryos were prepared for transmission electron microscopy (TEM) and focused-ion beam scanning electron microscopy (FIBSEM). For high-pressure freezing, embryos were transferred from an agar plate to the 150 µm cavity of a 3 mm aluminum specimen carrier using a needle or a pair of tweezers. 1-hexadecene was added on top and wicked off with a filter paper tip. Dextran (20% in PBS) was added on top to keep the embryos stuck to the carrier after freezing. The specimen carrier assembly was completed with a flat 3 mm aluminum specimen carrier lid. Samples were frozen in a HPM 100 high-pressure freezing machine (Leica Microsystems, Vienna, Austria).

For freeze-substitution and embedding the samples were sequentially incubated in water-free acetone with 1% OsO<sub>4</sub> for 8 hours at -90°C, gradually warmed to -60°C (30°C/hour), for 6 hours at -60°C, gradually warmed to -30°C (30°C/hour), for 3 hours at -30°C, gradually warmed to 0°C (30°C/hour), 1 hour at 0°C. Subsequently, samples were washed twice with water-free acetone at 4°C, block stained with 1% uranyl acetate in water-free acetone for 1 hour at 4°C (uranyl acetate was diluted from a 20% stock solution in water free methanol), rinsed twice with water-free acetone and finally imbedded in Epon/Araldite (Sigma-Aldrich), 66% Epon/Araldite at 4°C overnight, 100% Epon/Araldite for 1 hour, followed by polymerization at 60°C for at least 48 hours. Ultra-thin sections were prepared with a Leica EM FCS ultra microtome (Leica Microsystems). TEM images were acquired with a FEI Tecnai G2 Spirit TEM at an acceleration voltage of 120 kV (Thermo Fisher Scientific, Eindhoven, NL) equipped with a Gatan Orius 1000 digital Camera (Gatan Inc., Pleasanton, California, USA).

For FIBSEM tomography, a trimmed Epon/Araldite block containing the sample was mounted on a scanning electron microscopy (SEM) stub using conductive carbon and coated with 10 nm of carbon by electron-beam evaporation to render the sample conductive. Ion milling and image acquisition was performed in an Auriga 40 Crossbeam system (Zeiss, Oberkochen, Germany) using the FIBICS Nanopatterning Engine (Fibics Inc., Ottawa, Canada). For each sample, a trench was milled at a current of 20 nA and 30 kV, followed by fine milling at 600 pA during image acquisition with a feed of 10 nm / 5 nm per image, respectively. Prior to starting the

fine milling and imaging, a platinum layer of a few hundred nm was locally applied on top of the surface of the area of interest using the single gas injection system of the FIB-SEM. SEM images were acquired at 1.85 kV (60  $\mu\text{m}$  aperture and high-current mode) using an energy-selective back-scattered electron detector with a grid voltage of 1.4 kV. The pixel size was 5 nm. Imaging was tilt-corrected to obtain square pixels. The images were aligned in TrakEM2 using SIFT (Cardona et al., 2012). Finally the resulting volumes were segmented semi-manually with the carving module of Ilastik (Andres et al., 2012; Straehle et al., 2011) and visualized with Imaris (Bitplane AG, Zurich, Switzerland).



**Table S1: oligonucleotides and gene block sequences**

| name                                | sequence (5' -> 3') <sup>1)</sup>                                                                                                                                        |
|-------------------------------------|--------------------------------------------------------------------------------------------------------------------------------------------------------------------------|
| Act5C-F                             | GCCCATCTACGAGGGTTATGC                                                                                                                                                    |
| Act5C-R                             | AATCGCGACCAGCCAGATC                                                                                                                                                      |
| alphaTub84B-F                       | GCCAGATGCCGTCTGACAA                                                                                                                                                      |
| alphaTub84B-R                       | AGTCTCGCTGAAGAAGGTGTTGA                                                                                                                                                  |
| Tbp-F                               | CGCGCATCATCCAAAAGC                                                                                                                                                       |
| Tbp-R                               | GCCGACCATGTTTTGAATCTTAA                                                                                                                                                  |
| FM39                                | GAGCAGGAAGGCTACGAGTC                                                                                                                                                     |
| FM40                                | GGACTTTACTCGCCATTGCC                                                                                                                                                     |
| FM63                                | CCGCATCATGAACTCCTTCT                                                                                                                                                     |
| FM64                                | CCGGCCAGATAACTTCGTTT                                                                                                                                                     |
| FM65                                | CTCCAGCACGGAATCGATCA                                                                                                                                                     |
| FM66                                | TGGACAGCGTGGCATTGTAC                                                                                                                                                     |
| FM73                                | CTGACCCAGCAAATGTTCTGA                                                                                                                                                    |
| FM74                                | TTGCTCTGCACGTTGTACAT                                                                                                                                                     |
| FM79                                | CCAGTGCGGCAATCAGATC                                                                                                                                                      |
| FM80                                | TCGCCGTGGTAGTAACCAT                                                                                                                                                      |
| FM106                               | GTGCGTCAGTGTGTTCAATT                                                                                                                                                     |
| FM107                               | TGCAGATGCACAATTTCCCT                                                                                                                                                     |
| FM111                               | GTCCACAATTAGCTGGTGCA                                                                                                                                                     |
| FM113                               | GGGGACAAGTTTGTACAAAAAAGCAGGCTCAACATGAGGGAAATTGTG                                                                                                                         |
| FM114                               | GGGGACCACTTTGTACAAGAAAGCTGGGCTTACTCGCCATTGCCGTTCT                                                                                                                        |
| FM116                               | GGGGACAAGTTTGTACAAAAAAGCAGGCTCAACATGAGAGAAATCGTGAACCTG                                                                                                                   |
| FM117                               | GGGGACCACTTTGTACAAGAAAGCTGGGCTTAAATACAATCGCCCTCGAC                                                                                                                       |
| FM122                               | GGGGACAAGTTTGTACAAAAAAGCAGGCTCAACATGAGGGAGATTGTCACACTG                                                                                                                   |
| FM123                               | GGGGACCACTTTGTACAAGAAAGCTGGGCTTATTCGGTGCAATATTGACA                                                                                                                       |
| FM158                               | TGTCGCGTGTGAAACACTTC                                                                                                                                                     |
| FM159                               | CCAGCCTGACCAACATGGAT                                                                                                                                                     |
| FM160                               | GAGCCCTACAACCTCCATCCT                                                                                                                                                    |
| FM161                               | TTTCGGCGACAGATGTCGTA                                                                                                                                                     |
| FM164                               | TCACATCCAAGCTGGTCAGT                                                                                                                                                     |
| FM165                               | TGCCATGCTCATCGGAGATG                                                                                                                                                     |
| FM170                               | CCACAAATCGCCGCTTTCAA                                                                                                                                                     |
| FM171                               | CGTGCTCCTCGGAAATGATC                                                                                                                                                     |
| FM176                               | CTTGAACCGAGGGTGATCA                                                                                                                                                      |
| FM177                               | TATAGCCTGAGGCCAGTTG                                                                                                                                                      |
| FM180                               | TTGGATGTGGTCCGAAAGGA                                                                                                                                                     |
| FM181                               | TCTTCGAGATCAGCAGGGTT                                                                                                                                                     |
| FM200                               | GGGGACAAGTTTGTACAAAAAAGCAGGCTCAACATGAGGGAAATCGTTCACATC                                                                                                                   |
| FM201                               | GGGGACCACTTTGTACAAGAAAGCTGGGCTTAGTTCTCGTGCACCTCAGC                                                                                                                       |
| FM208                               | CCGAGGGCCGCATAGGCCCAACATGAGGGAAATTGTGC                                                                                                                                   |
| FM209                               | CTGAGTCTAGATTACTCGCCATTGCCGTTCTGCAGGAC                                                                                                                                   |
| FM212                               | CCGAGGGCCGCATAGGCCCAACATGAGAGAAATCGTG                                                                                                                                    |
| FM213                               | AGTCTAGATTAATAACAATCGCCCTCGACCTCCTCC                                                                                                                                     |
| FM214                               | CCGAGGGCCGCATAGGCCCAACATGCGTGAAATTGTAC                                                                                                                                   |
| FM215                               | CTGAGTCTAGATTATTCATCGCCGCCACCCTCTTCGTC                                                                                                                                   |
| CL204                               | GCAGGAAGCTTATGTCCCTATACTAGGTTAT                                                                                                                                          |
| CL205                               | GATCGTCAGTCAGTCACGATG                                                                                                                                                    |
| Gene block N-C<br><i>betaTub56D</i> | ggaggccATGgGGGAAATCGTTCACATCCAAGCTGGTCAGTGCGGCAACCAAATC<br>GGCGCAAAGTTCTGGGAGATCATCTCCGATGAGCATGGCATCGATGCCACCG<br>GCGCCTACCACGGTGACAGCGACCTGCAGCTGGAGCGCATCAATGTGTACTAC |

|                                           |                                                                                                                                                                                                                                                                                                                                                                                                                                                                                                                                                                             |
|-------------------------------------------|-----------------------------------------------------------------------------------------------------------------------------------------------------------------------------------------------------------------------------------------------------------------------------------------------------------------------------------------------------------------------------------------------------------------------------------------------------------------------------------------------------------------------------------------------------------------------------|
|                                           | AATGAGGCGTCCGGTaaagcttgccagcggatccAACATGAACGATCTGGTGTCCGAGT<br>ACCAGCAGTACCAGGAGGCCACCGCCGACGAGGACGCCGAGTTCGAGGAGG<br>AGCAGGAGGCTGAGGTCGACGAGAACTAAtagcggccgcgagcagg                                                                                                                                                                                                                                                                                                                                                                                                        |
| <i>Gene block<br/>N-C<br/>betaTub60D</i>  | ggaggccATGgGAGAAATCGTGAACCTGCAGGCCGGCCAGTGCGGCAACCAAT<br>CGGCGCTAAGTTCTGGGAGATCATTTCCGAGGAGCACGGCATCGACAGCAATG<br>GCATCTACGTGGGCGACAGTGATCTGCAGCTGGAGCGCGTCAAGTGTCTACTAC<br>AACGAAGCATCGGCAaagcttgccagcggatccAACATGAACGACCTGGTGTCCGAGT<br>ACCAGCAGTACCAGGAGGCCACCGCCGACGACGAGTTCGACCCGGAGGTCAA<br>TCAGGAGGAGGTTCGAGGGCGATTGTATTTAAtagcggccgcgagcagg                                                                                                                                                                                                                         |
| <i>Gene block<br/>N-C<br/>betaTub65B</i>  | ggaggccATGgGGGAGATTGTCACACTGCAGATCGGCCGAGCCGGAATGCCAT<br>CGGAGATTCTTTCTGGCACGTGATTTACATGAACACGGTGTGGATTATGCTTC<br>TGGTCGATTTGGCGGCACCAGTCCACTTCAGCTGGAGCGGATCAATGTGTTCT<br>TTAACGCAACGGCCAGCaagcttgccagcggatccGAGTTACAAGCCATCATCGATGAT<br>TACCGCAGTAGTGCTGAGGGCGAGGATTCCGGTGGTGGCGGTGGAGGAGGC<br>GGTGGCCGAAGTGGAAGCGCCGAAAGCGGTGAAGAGGAGGCCACGCCCGAA<br>GCCATTGTCAATATTGCACCGAATAAAtagcggccgcgagcagg                                                                                                                                                                        |
| <i>Gene block<br/>N-C<br/>betaTub85D</i>  | ggaggccATGgGTGAAATTGTACACATTCAGGCCGGTCAATGCGGTAACCAGATC<br>GGTGGTAAATTCTGGGAGGTAATCTCGGATGAGCACTGTATAGATGCGACCGG<br>AACGTACTACGGCGATAGTGATCTCCAGCTGGAGCGCATCAATGTATACTACAA<br>TGAAGCCACCGGTaagcttgccagcggatccAACATGAACGACTTGGTTTCTGAATATC<br>AGCAGTACCAGGAGGCGACTGCCGATGAGGAGGGCGAATTCGATGAAGACGA<br>AGAGGGTGGCGCGATGAATAAAtagcggccgcgagcagg                                                                                                                                                                                                                                |
| <i>Gene block<br/>N-C<br/>betaTub97EF</i> | ggaggccATGgGGGAAATTGTGCATCTGCAGGCCGGCCAGTGCGGCAATCAGAT<br>CGGTTTCAAGTTCTGGGAAATCATCTCCGACGAGCACGGCATCGATCCCAATG<br>GTTACTACCACGGCGAGTCCGCCCTGCAGCACGAGCGGATCGATGTTTACTAC<br>AACGAGGCCAGCAGCaagcttgccagcggatccAACATGAACGATCTGATATCCGAGT<br>ACCAACAGTACCAGGAGGCTACCGCCGACGACGAAGTGGAGTTCGATGACGA<br>GCAGGCCGAGCAGGAAGGCTACGAGTCCGAGGTCCTGCAGAACGGCAATGGC<br>GAGTAAAtagcggccgcgagcagg                                                                                                                                                                                          |
| <i>Gene block<br/>betaTub97EF-<br/>4C</i> | ACACAGAGGGCGCCGAGCTGATCGATTCCGTGCTGGAGGTGCTGCGCAAGGA<br>ATCCGAGGGCTGCGACTGCCTGCAGGGCTTCCAGCTGGCTCACTCGCTTGGC<br>GGAGGCACTGGCTCCGGCCTGGGCACGCTGCTCATCTCGAAGATTCGCGAGG<br>AGTACCCCGACCGCATCATGAACTCCTTCTCCGTGGTGCCATCGCCCAAGGTG<br>TCTGAGGTGGTGGTGGAGCCATATAACGCCACGTTGTGCTGCACCAGCTAAT<br>TGTGGACACCGATGAGACGTTCTGCATCGACAACGAGGCTTTGTATGACATCT<br>GCTATCAGAGCTTGCATCTGCTCGCCACCTACCAGGATCTCAACCACCTG<br>GTGTCAGTCACAATGTCCGGAGTGACCACCTGCCTGCGCTTCCCTGCCAGCT<br>GAACGCTGATCTTCGCAAGCTGGCGGTGAACATGGTGCCCTTCCCGCTCTGC<br>ACTTCTCATGCCCGGATTCGCTCCGCTGACCGCCAAGGGATCCAGCAATAT |

<sup>1)</sup> Blue type indicates the attB1/attB2 sequence used for Gateway cloning, red type the *Drosophila* Kozak consensus sequence.

## Supplementary References

- Andres, B., Koethe, U., Kroeger, T., Helmstaedter, M., Briggman, K.L., Denk, W. and Hamprecht, F.A.** (2012). 3D segmentation of SBFSEM images of neuropil by a graphical model over supervoxel boundaries. *Med Image Anal* **16**, 796-805.
- Bischof, J., Bjorklund, M., Furger, E., Schertel, C., Taipale, J. and Basler, K.** (2013). A versatile platform for creating a comprehensive UAS-ORFeome library in *Drosophila*. *Development* **140**, 2434-2442.
- Bischof, J., Maeda, R.K., Hediger, M., Karch, F. and Basler, K.** (2007). An optimized transgenesis system for *Drosophila* using germ-line-specific phiC31 integrases. *Proc Natl Acad Sci U S A* **104**, 3312-3317.
- Cardona, A., Saalfeld, S., Schindelin, J., Arganda-Carreras, I., Preibisch, S., Longair, M., Tomancak, P., Hartenstein, V. and Douglas, R.J.** (2012). TrakEM2 software for neural circuit reconstruction. *PLoS One* **7**, e38011.
- Radermacher, P.T., Myachina, F., Bosshardt, F., Pandey, R., Mariappa, D., Muller, H.A. and Lehner, C.F.** (2014). O-GlcNAc reports ambient temperature and confers heat resistance on ectotherm development. *Proc Natl Acad Sci U S A* **111**, 5592-5597.
- Rubin, G.M., Hong, L., Brokstein, P., Evans-Holm, M., Frise, E., Stapleton, M. and Harvey, D.A.** (2000). A *Drosophila* complementary DNA resource. pp. 2222-2224.
- Smith, D.B. and Johnson, K.S.** (1988). Single-step purification of polypeptides expressed in *Escherichia coli* as fusions with glutathione S-transferase. *Gene* **67**, 31-40.
- Stapleton, M., Carlson, J., Brokstein, P., Yu, C., Champe, M., George, R., Guarin, H., Kronmiller, B., Pacleb, J., Park, S., et al.** (2002). A *Drosophila* full-length cDNA resource. *Genome Biol* **3**, RESEARCH0080.0081-0080.0088.
- Straehle, C.N., Koethe, U., Knott, G. and Hamprecht, F.A.** (2011). Carving: scalable interactive segmentation of neural volume electron microscopy images. *Med Image Comput Comput Assist Interv* **14**, 653-660.
- Venken, K.J., Schulze, K.L., Haelterman, N.A., Pan, H., He, Y., Evans-Holm, M., Carlson, J.W., Levis, R.W., Spradling, A.C., Hoskins, R.A., et al.** (2011). MiMIC: a highly versatile transposon insertion resource for engineering *Drosophila melanogaster* genes. *Nat Methods* **8**, 737-743.
